1 **Cytoplasmic zinc regulates IL-1 $\beta$  production by monocytes/macrophages *via***  
2 **mTORC1-induced glycolysis in rheumatoid arthritis (RA)**

3 Bonah Kim,<sup>1</sup> Hee Young Kim,<sup>1, 2, 3</sup> Bo Ruem Yoon,<sup>2</sup> Jina Yeo,<sup>4</sup> Kyung-Sang Yu,<sup>5</sup> Hyeon Chang Kim,<sup>6</sup>  
4 Jin Kyun Park,<sup>4</sup> Seong Wook Kang,<sup>7</sup> and Won-Woo Lee<sup>1, 2, 8, \*</sup>

5 <sup>1</sup>: Laboratory of Autoimmunity and Inflammation (LAI), Department of Biomedical Sciences, and  
6 BK21Plus Biomedical Science Project, Seoul National University College of Medicine, Seoul 03080,  
7 Republic of Korea.

8 <sup>2</sup>: Department of Microbiology and Immunology, Seoul National University College of Medicine;  
9 Cancer Research Institute, Seoul National University College of Medicine, Seoul 03080, Republic of  
10 Korea.

11 <sup>3</sup>: Cancer Research Institute and Institute of Infectious Diseases, Seoul National University College of  
12 Medicine, Seoul 03080, Republic of Korea.

13 <sup>4</sup>: Division of Rheumatology, Department of Internal Medicine, Seoul National University College of  
14 Medicine, Seoul 03080, Republic of Korea.

15 <sup>5</sup>: Department of Clinical Pharmacology and Therapeutics, Seoul National University College of  
16 Medicine and Hospital, Seoul 03080, Republic of Korea

17 <sup>6</sup>: Department of Preventive Medicine, Yonsei University College of Medicine, Seoul, Republic of  
18 Korea.

19 <sup>7</sup>: Department of Internal Medicine, Chungnam National University School of Medicine, 282 Munhwa-  
20 ro, Jung-gu, Daejeon, Republic of Korea.

21 <sup>8</sup>: Cancer Research Institute, Ischemic/Hypoxic Disease Institute, and Institute of Infectious Diseases,  
22 Seoul National University College of Medicine; Seoul National University Hospital Biomedical  
23 Research Institute, Seoul 03080, Republic of Korea.

24

25 **\* Correspondence:**

26

27 Won-Woo Lee D.V.M., Ph.D.

28 Professor

29 Department of Microbiology and Immunology

30 Department of Biomedical Sciences

31 Seoul National University College of Medicine

32 103 Daehak-ro, Jongno-gu, Seoul 03080, South Korea.

33 Tel) +82-2-740-8303, Fax) +82-2-743-0881

34 E-mail) [wonwoolee@snu.ac.kr](mailto:wonwoolee@snu.ac.kr)

35 **One Sentence Summary**

36 Cytoplasmic zinc regulates IL-1 $\beta$  production in monocytes/macrophages downstream of mTORC1-  
37 S6K-induced glycolysis *via* zinc-mediated inhibition of PP2A.

38 **ABSTRACT**

39           The essential micronutrient zinc plays regulatory roles in immune responses through its  
40 ability to affect signaling pathways. In activated monocytes/macrophages, signaling networks  
41 mediate metabolic reprogramming in order to meet the demands of participating in immune  
42 responses. Despite its known immunoregulatory roles, the effect of zinc on metabolic  
43 reprogramming in monocytes/macrophages remains unclear. Here, we demonstrate that cytoplasmic  
44 bioavailable zinc is essential for regulating IL-1 $\beta$  production in activated human  
45 monocytes/macrophages downstream of mTORC1-induced glycolysis. The cytoplasmic zinc level  
46 was influenced by extracellular zinc concentration through a zinc-specific importer, Zip8, which was  
47 markedly increased in monocytes of patients with rheumatoid arthritis (RA), a chronic inflammatory  
48 disease, and even in LPS-stimulated monocytes/macrophages of healthy individuals. Mechanically,  
49 phosphorylation of S6 kinase, a substrate of mTORC1, was significantly enhanced by zinc-mediated  
50 inhibition of PP2A, an S6 kinase phosphatase. As a result, IL-1 $\beta$  production was increased due to the  
51 activation of mTORC1-induced glycolysis. The expression of Zip8 and MT2A, a zinc-inducible  
52 gene, and the phosphorylation of S6 kinase by monocytes of RA patients was significantly enhanced  
53 compared with those of HCs and Zip8 levels positively correlated with RA clinical parameters,  
54 suggesting that Zip8-mediated zinc influx is related to inflammatory conditions. These results  
55 provide insight into the role of cytoplasmic bioavailable zinc in the metabolic reprogramming of  
56 human monocytes/macrophages which is an essential process for inflammatory responses.

## 57 **Introduction**

58 Zinc is an essential trace element that plays pivotal roles in multiple cellular functions(1, 2).  
59 It is well known for its conventional role as a cofactor that modulates structural or regulatory  
60 functions of thousands of proteins(3, 4). More recently, it has been suggested that zinc also functions  
61 as an intracellular signaling molecule, facilitating the transduction of a variety of signaling cascades  
62 in response to extracellular stimuli(5-8). Zinc deficiency is associated with various clinical problems  
63 including growth retardation, immune system dysfunction, and neurological disorders(9-11).  
64 Intracellular zinc homeostasis is tightly regulated by two families of proteins, the solute-linked  
65 carrier 39 (SLC39A, or Zip) family of zinc importers and solute-linked carrier 30 family (SLC30A,  
66 or ZnT) of zinc exporters. A total of 14 Zips and 10 ZnTs coordinately mediate flux of zinc ions  
67 across membranes in a cell- or tissue-specific manner(12).

68 Accumulating evidence demonstrates that zinc has an influence on the growth, development,  
69 and integrity of the immune system(1, 13). It has been demonstrated that abnormal zinc homeostasis  
70 caused by zinc deficiency impairs overall innate and adaptive immune functions. Zinc deficiency in  
71 the innate immune system is characterized by reduced PMN chemotaxis and phagocytosis of  
72 macrophages, with a resultant decrease in production of pathogen-neutralizing reactive oxygen  
73 species (ROS)(13). In addition, the production of pro-inflammatory cytokines by monocytes is  
74 markedly impaired by zinc deficiency(8, 14-16). In the adaptive system, zinc deficiency also  
75 detrimentally affects the development and function of T and B cells, which causes T-cell  
76 lymphopenia, imbalance among the different helper T-cell subsets, and reduced antibody  
77 production(17-19). Clinically, zinc deficiency resulting from malnutrition and dysregulated  
78 homeostasis increases susceptibility to viral and bacterial infections(20). Zinc supplementation has  
79 been reported to be beneficial for restoring immune function during various infectious diseases,

80 including bacterial infections and malaria. However, mechanisms underlying zinc-mediated immune  
81 regulation and the resulting immunological consequences have not been well defined.

82 A number of studies have shown that activation-mediated zinc influx is spatiotemporally  
83 modulated in a variety of immune cells(6, 19, 21). In the cytoplasm bioavailable zinc ions participate  
84 in regulation of signaling molecule activity, which consequently shapes immune responses(1, 5).  
85 Mechanically, cytoplasmic zinc is known to regulate signal transduction through inhibition of  
86 phosphatases, including protein tyrosine phosphatases (PTPs) and serine/threonine phosphatases  
87 (PSPs), rather than by affecting kinase activity(22, 23). Given that phosphatases are generally  
88 involved in negative feedback of signaling activity, this aligns with the fact that cytoplasmic zinc  
89 ions elicit prolonged immune cell signaling and enhanced immune responses(6, 17, 18).

90 Inflammation is an indispensable process required to protect the host against pathogen  
91 invasion and tissue damage. Mononuclear phagocytes, especially monocytes and macrophages, play  
92 crucial roles in the initiation, regulation, and resolution of inflammatory responses through  
93 phagocytosis, cytokine production, generation of ROS, and activation of adaptive immunity(24, 25).  
94 Because immune responses are energy-demanding biosynthetic processes, stimulated monocytes and  
95 macrophages require intricate metabolic reprogramming to fulfill their metabolic requirements  
96 during immune responses. Among these, activation of glycolysis is a critical pathway in cellular  
97 metabolism that provides intermediates for energy generation(24). Recent studies have suggested  
98 that in response to the TLR4 agonist LPS there is increased glycolytic activity, which leads to  
99 increased production of inflammatory cytokines such as IL-1 $\beta$ . In macrophages the inhibition of  
100 glycolysis with 2-deoxy-D-glucose (2-DG) treatment markedly suppresses pro-IL-1 $\beta$  production and  
101 active IL-1 $\beta$  secretion(26). Several studies have suggested that the mammalian target of rapamycin  
102 complex 1 (mTORC1), a serine-threonine protein kinase, is both involved in aerobic glycolysis and

103 regulates immune responses by monocytes/macrophages(24, 27, 28). Although zinc is a crucial  
104 factor involved in induction of IL-1 $\beta$  by monocytes/macrophages, little is known about its role in  
105 regulating metabolic reprogramming, especially during mTORC1-mediated glycolysis in human  
106 monocytes and macrophages.

107 Here, we examine the hypothesis that zinc functions as a regulator of IL-1 $\beta$  production in  
108 activated human monocytes/macrophages via mTORC1-induced glycolysis. Our data provide new  
109 insight into how cytoplasmic bioavailable zinc is involved in metabolic reprogramming of human  
110 monocytes/macrophages which is an essential process for inflammatory responses and might be is  
111 related to pathogenesis of inflammatory diseases such as RA.

112 **Results**

113 ***Enhanced expression of Zip8 in monocytes of patients with RA and activated***  
114 ***monocytes/macrophages of HCs.***

115 Monocytes and macrophages are activated in RA patients(29-31), and thus, their unique  
116 regulation of zinc homeostasis is possibly involved in order to meet zinc demand. The re-analysis on  
117 our previous microarray data (E-MTAB-6187) showed that among 10 zinc-specific importer (ZnT)  
118 and 14 zinc-specific importer (Zip) proteins, expression of Zip8 was greatly upregulated in  
119 monocytes of RA patients when compared with those of healthy controls (Fig. 1A). This finding was  
120 confirmed in peripheral CD14<sup>+</sup> monocytes purified from HCs and RA patients in a secondary cohort  
121 (Fig. 1B). Furthermore, mRNA expression of Zip8 was further enhanced in monocytes derived in  
122 synovial fluid, which is the site of inflammation in RA patients (Suppl. Fig. 1). Given activation-  
123 mediated changes in many zinc transporters by T cells(32), we first assessed the expression of Zip  
124 genes in monocytes and monocytes-derived macrophages (hereafter, macrophages) upon LPS  
125 stimulation. As seen in Figure 1C and D, resting monocytes and macrophages had relatively higher  
126 expression of Zip1 and Zip8 compared to other Zips. In addition, LPS stimulation led to a dramatic  
127 increase of Zip8 in both monocytes and macrophages. This suggests that Zip8 plays important roles  
128 in the regulation of zinc influx in monocytes and macrophages.

129 ***Zinc influx is dependent on extracellular zinc levels and occurs via Zip8 transporters.***

130 To examine whether the increase in intracellular zinc in monocytes/macrophages is  
131 dependent on extracellular zinc, FluoZin-3, a zinc specific-fluorescent probe, was used to monitor  
132 cytoplasmic, bioavailable zinc ions in real-time. Although the pattern of cytoplasmic zinc increase  
133 differs between monocytes and macrophages, influx of zinc ions was found to occur immediately

134 after treatment with FluoZin-3 buffer supplemented with zinc. Moreover, the intracellular zinc level  
135 was found to be dependent on the extracellular zinc concentration (Fig. 2A and B). This increase was  
136 sustained until 50 min after zinc treatment. Metallothionein (MT) is a metal-binding protein that  
137 plays coordinated roles in the distribution, transport, and maintenance of intracellular zinc(33).  
138 Further, the induction of MT expression is dependent on the increase of intracellular zinc. Our data  
139 show that the expression of MT2A, a major isoform of MT family proteins, was markedly induced in  
140 proportion to zinc influx in monocytes and macrophages. LPS stimulation further upregulated MT2A  
141 mRNA expression, suggesting that increased zinc influx occurs following LPS stimulation (Fig. 2C  
142 and D). Since the zinc transporter Zip8 is highly expressed in resting and activated human monocytes  
143 and macrophages (Fig. 1C and D), we tested whether Zip8 contributes to an increased zinc influx by  
144 a Zip8 siRNA (siZip8) knockdown experiment. Macrophages were transfected with Zip8-targeted or  
145 scrambled siRNA followed by stimulation with LPS for 18 h. As evidenced by qPCR and  
146 immunoblotting, expression of Zip8 in macrophages was efficiently silenced (over 80% reduced;  
147 Suppl. Fig. 2), and this led to a significant reduction of both zinc influx and MT2A mRNA induction  
148 (Fig. 2E and F). Lastly, we found that the cytoplasmic zinc level in *ex vivo* monocytes of healthy  
149 donors exhibits a significant positive correlation with the plasma level of zinc ions (Fig. 2G;  $p =$   
150 0.026), supporting our findings (Fig. 2A and B). These data demonstrate that zinc is fluxed into  
151 monocytes and macrophages in part via Zip8 and that this influx is dependent on extracellular zinc  
152 levels.

### 153 ***Increased extracellular zinc boosts production of IL-1 $\beta$ in human monocytes/macrophages.***

154 To explore the role of zinc in the production of effector cytokines by monocytes and  
155 macrophages, we tested whether increased extracellular zinc influences the production of IL-1 $\beta$   
156 following LPS stimulation of these cells. Freshly isolated monocytes and monocyte-derived



157 macrophages were pretreated for 2 hr with TPEN (*N,N,N',N'*-tetrakis(2-pyridinylmethyl)-1,2-  
158 ethanediamine), a membrane-permeant zinc-specific chelator, or culture media supplemented with  
159 different concentrations of ZnCl<sub>2</sub>, followed by stimulation with LPS for monocytes or LPS and ATP  
160 or macrophages. The viability of monocytes was not influenced by these culture conditions (Suppl.  
161 Fig. 3A). The secretion of IL-1 $\beta$  in the supernatant of LPS-stimulated monocytes and macrophages  
162 was potently increased in a zinc concentration-dependent manner (Fig. 3A and B). The increase in  
163 intracellular pro-IL-1 $\beta$  in LPS-stimulated monocytes and macrophages also occurred in a zinc  
164 concentration-dependent manner (Fig. 3C and 4D). Moreover, this effect was more apparent in the  
165 culture supernatant, as it showed that the proteolytic processing and secretion of caspase-1 and IL-1 $\beta$   
166 resulted in increased levels of these cytokines in a zinc concentration-dependent manner. In addition  
167 to IL-1 $\beta$ , the production of TNF- $\alpha$  and IL-6 was also dependent on zinc concentration (Suppl. Fig.  
168 3B) as previously reported(8). These data show that zinc is important for production of IL-1 $\beta$  and  
169 increased extracellular zinc promotes production of IL-1 $\beta$  in human monocytes/macrophages.

170 ***Increased intracellular zinc is associated with upregulation of glycolytic metabolism.***

171 In innate immune cells glycolytic metabolism is closely linked to the production of immune-  
172 critical cytokines such as IL-1 $\beta$ (27, 34, 35). Enhanced glucose influx, which is facilitated by  
173 upregulated expression of glucose transporter 1 (GLUT1), is intimately associated with their  
174 glycolytic stimulation(36). We found that Glut1 expression is significantly increased in LPS-  
175 stimulated monocytes and macrophages under higher zinc concentrations (Fig. 4A). Furthermore,  
176 lactate, a glycolytic end-product, was also increased in human monocytes in proportion to the  
177 cytoplasmic bioavailable zinc level compared to that of the unstimulated control (Fig. 4B). To further  
178 investigate the effect of zinc on glycolytic metabolism in activated monocytes and macrophages, the  
179 extracellular acidification rate (ECAR), a parameter of glycolytic metabolism, was measured in

180 monocytes or macrophages activated by LPS in the presence of different concentrations of zinc or  
181 TPEN. As expected, LPS stimulation induced glycolytic metabolism in monocytes and macrophages  
182 (Fig. 4C and D). The ECAR in monocytes and macrophages was markedly increased by higher  
183 levels of zinc compared to 3  $\mu$ M zinc or TPEN treated groups (Fig. 4C-F). To functionally explore  
184 the effect of zinc on glucose metabolism during glycolysis, monocytes were treated with 2-DG, a  
185 glucose analog, to inhibit glucose metabolism. Treatment with 30  $\mu$ M zinc only partially antagonized  
186 the inhibitory effect of 2-DG on IL-1 $\beta$  production, showing that IL-1 $\beta$  production of monocytes  
187 treated with 30  $\mu$ M zinc and 5 mM of 2-DG was comparable that of monocytes treated with 3  $\mu$ M  
188 zinc without 2-DG (Fig. 4G). This data suggests that enhanced glycolytic metabolism in human  
189 monocytes/macrophages might be affected by increased intracellular zinc.

190 ***Intracellular zinc is important for activation of the mTORC1-S6K signaling pathway.***

191 Zinc plays a fundamental role in controlling monocyte/macrophage functions and  
192 intracellular zinc is essential for activation-induced signal transduction in monocytes(1, 8, 37-39). As  
193 reported(8, 40), phosphorylation of Erk1/2 was found to markedly increase in a zinc concentration-  
194 dependent manner in activated human primary monocytes, whereas zinc had no obvious effect on  
195 NF- $\kappa$ B or p38 activity (Suppl. Fig. 4A). Similar to Erk1/2, the phosphorylation of mTOR activity  
196 was upregulated with treatment under conditions of increased zinc, suggesting zinc affects more than  
197 one major signaling pathway in activated monocytes (Suppl. Fig. 4A and Fig. 5A). Others and we  
198 reported that mTORC1-S6K activation is responsible for aerobic glycolysis that plays a pivotal role  
199 in the effector function of monocytes/macrophages (27, 28, 41). Thus, we sought to explore the  
200 signaling role of zinc in the mTOR pathway. To this end, phosphorylation of upstream and  
201 downstream molecules in the mTOR pathway, such as Akt, S6K and 4E-BP1, were analyzed in zinc-  
202 treated monocytes. Chelation of zinc with TPEN caused remarkably diminished Akt/mTOR

203 activation in monocytes. Moreover, we found that cytoplasmic zinc is indispensable for  
204 phosphorylation of S6K, a substrate of mTORC1 (Fig. 5B). To further elucidate whether zinc-  
205 dependent enhancement of S6K activity is simply a downstream consequence of increased Akt  
206 activity, monocytes were treated with MK-2206, an Akt-selective inhibitor, and incubated with  
207 culture media supplemented with 3 or 30  $\mu$ M of zinc. As seen in Figure 5C, phosphorylation of Akt  
208 was dramatically inhibited in the MK2206-treated monocytes, irrespective of zinc concentration,  
209 whereas the inhibitory effect of S6K activation by MK2206 was limited in monocytes treated with  
210 30  $\mu$ M of zinc. Figure 5D shows that enhancement of Akt activation by 30  $\mu$ M zinc treatment is  
211 completely inhibited by 10 nM MK2206, while S6K activation is not significantly changed under  
212 these conditions, suggesting involvement of other mechanisms in zinc-dependent enhancement of  
213 S6K activity. A similar finding was made in LPS-activated monocytes (Suppl. Fig. 4B). Of interest,  
214 zinc-mediated phosphorylation of S6K was observed in monocytes and macrophages even without  
215 LPS stimulation (Fig. 5E). Since phosphorylation of the ribosomal S6 protein (S6) is directly linked  
216 to the activity of the mTORC1-S6K(42), we analyzed the relationship between phosphorylation of  
217 S6 and the level of cytoplasmic bioavailable zinc in *ex vivo* monocytes from healthy donors and  
218 found a significant correlation (Fig. 5F;  $p = 0.0036$ ). As seen in Figure 5G and H, LPS stimulation  
219 markedly enhanced mTORC1-S6K activation in a time-dependent manner until 1 hr post-activation.  
220 Further, this activity was maintained until 6 hr post-activation in LPS-stimulated macrophages  
221 (Suppl. Fig. 4C). Since glucose metabolism is critical for a shift towards glycolytic reprogramming,  
222 2-DG abated phosphorylation of S6K in a dose-dependent manner (Fig. 5I). However, in agreement  
223 with our finding in Figure 4G, treatment with 30  $\mu$ M zinc partially antagonized the inhibitory effect  
224 of 2-DG on S6K activity (Fig. 5J), showing that phosphorylation of S6K in monocytes treated with  
225 30  $\mu$ M zinc and 5 mM of 2-DG was comparable that of monocytes treated with 3  $\mu$ M zinc without 2-  
226 DG. Our data demonstrate that intracellular zinc is critical for mTORC1-S6K activation in human

227 monocytes and macrophages and zinc-mediated mTORC1 activity provokes enhanced glycolytic  
228 metabolism.

229 ***The effects of zinc on mTORC1 activity are mediated by PP2A in human monocytes/macrophages.***

230 Our data thus far suggest that the zinc-mediated activation of the mTORC1-S6K pathway  
231 contributes to increased production of IL-1 $\beta$  via enhanced glycolytic metabolism. Next, we sought to  
232 investigate the molecular mechanisms underlying the regulation of phosphorylation of S6K by zinc.  
233 Zinc ions are known to inactivate several types of protein phosphatases(6, 18, 22). Therefore, we  
234 hypothesized that cytoplasmic zinc ions influence the activity of protein phosphatases regulating  
235 mTORC1-S6K activity in human monocytes and macrophages. Recent studies have shown that S6K  
236 activity is negatively regulated by serine/threonine phosphatases, such as protein phosphatase  
237 2A (PP2A) and pleckstrin homology domain leucine-rich repeat protein phosphatase (PHLPP), via  
238 dephosphorylation(43, 44). However, little is known about the effect of zinc on these protein  
239 phosphatases in immune cells. PP2A protein, including PP2A-B and C subunits, is abundantly  
240 expressed in *ex vivo* monocytes with no obvious change in expression observed following LPS  
241 stimulation (Fig. 6A). Treatment with LB100, a small molecule inhibitor of PP2A, was found to  
242 intensify LPS-induced phosphorylation of mTOR pathway-related molecules, including Akt,  
243 mTORC1 and S6K, in human monocytes (Fig. 6B). Furthermore, IL-1 $\beta$  production was significantly  
244 increased by inhibition of PP2A activity with LB100 (Fig. 6C). Similar results were also obtained in  
245 LPS-stimulated monocytes treated with Okadaic acid, a general inhibitor of serine/threonine  
246 phosphatases PP1 and PP2A (Fig. 6C and Suppl. Fig. 5A). Since PP2A is known to interact with its  
247 substrates, we examined its physical associations in cells. The interaction of PP2A subunits with S6K  
248 was detected in transiently transfected 293T cells (Fig. 6D) by immunoprecipitation. More  
249 importantly, the interaction between endogenous PP2A and S6K was confirmed in resting and LPS-  
250 stimulated human macrophages (Fig. 6E). Given that phosphorylation of Tyr307 of the PP2A-C

251 subunit decreases its phosphatase activity(45, 46), we next asked whether zinc-enhanced  
252 phosphorylation of S6K is attributable to inhibition of phosphatase activity through this mechanism.  
253 To this end, phosphorylation of PP2A was examined in monocytes incubated with different zinc  
254 concentrations. Treatment with 30  $\mu\text{M}$  of zinc caused significantly increased phosphorylation of the  
255 PP2A-C subunit compared to monocytes treated with TPEN or 3  $\mu\text{M}$  of zinc (Fig. 6F). PP2A activity  
256 was also measured by *in vitro* serine/threonine protein phosphatase assay to investigate the direct  
257 effect of zinc on phosphatase activity. Lysates, which were prepared from primary monocytes, were  
258 treated with the indicated concentration with  $\text{ZnCl}_2$ , followed by reaction with a chemically  
259 synthesized phosphopeptide substrate specific for PP2A, but not PP1. As seen in Figure 6G, at  
260 concentrations over 500  $\mu\text{M}$  zinc significantly inhibited PP2A activity. The monocyte lysates treated  
261 with 1,000  $\mu\text{M}$  of zinc had PP2A activity as low as those treated with LB100, the PP2A-specific  
262 inhibitor. It should be noted that the effective zinc concentration in the *in vitro* phosphatase assay  
263 was supraphysiological compared to its concentration in our cell culture system. Because various  
264 buffers used for the *in vitro* phosphatase assay may affect the bioavailable zinc concentration  
265 (possibly via chelation), we measured the actual zinc ion concentration using a conventional zinc  
266 assay kit. No zinc ion was detected in lysates from cells treated with less than 100  $\mu\text{M}$  of zinc,  
267 whereas the zinc level was around 3  $\mu\text{M}$  in the lysates of cells treated with 500  $\mu\text{M}$  zinc, which  
268 exhibited an inhibitory effect on PP2A activity in cell culture, suggesting there was zinc-chelating  
269 activity of the buffers used in the phosphatase assay (Suppl. Fig. 5B). Lastly, we investigated  
270 whether PHLPP, another candidate phosphatase, is involved in zinc-mediated regulation of S6K  
271 activity and glycolysis. PHLPP was not found to interact with S6K in THP-1 derived macrophages  
272 (Suppl. Fig. 6A) nor was the PHLPP-specific inhibitor, NSC-45586, found to have an effect on the  
273 phosphorylation of S6K in LPS-stimulated monocytes (Suppl. Fig. 6B). Thus, there appears to be no  
274 regulatory role of PHLPP on S6K activity in human monocytes and macrophages. These data

275 demonstrate that the regulation of mTORC1 activity by PP2A phosphatase is mediated by  
276 intracellular zinc in human monocytes and macrophages.

277 ***Zinc-mediated metabolic reprogramming in monocytes is associated with clinical parameters of***  
278 ***RA patients***

279 Our data thus far suggest that Zip8-mediated influx of zinc contributes to increased  
280 production of IL-1 $\beta$  by activated mTORC1-induced glycolysis in monocytes and macrophages.  
281 Sustained hyper-inflammatory activity of glycolytic monocytes/macrophages is a key parameter of  
282 RA(24, 47), suggesting that metabolic reprogramming occurs in these cells. Therefore, we sought to  
283 examine whether zinc-mediated metabolic reprogramming is associated with clinical parameters and  
284 disease activity of RA patients. Zip8 expression by monocytes of RA patients had a significant  
285 positive correlation with disease activity score 28 based on erythrocyte sedimentation rate (DAS28-  
286 ESR) and C-reactive protein (DAS28-CRP), which represent enhanced inflammatory responses (Fig.  
287 7A,  $p = 0.0072$  and  $p = 0.0050$ , respectively and Suppl. Fig. 7A). Peripheral monocytes of RA  
288 patients had significantly higher mRNA level of MT2A, which is directly induced by cytoplasmic  
289 zinc, compared with HCs (Fig. 7B). The increase of MT2A was amplified in synovial monocytes of  
290 RA patients (Suppl. Fig. 7B). Furthermore, mRNA level of MT2A in monocytes of RA patients was  
291 significantly correlated with Zip8 and IL-1 $\beta$  expression (Fig. 7C), suggesting that zinc-mediated  
292 metabolic reprogramming may contribute to establishment of the inflammatory milieu in RA  
293 disease. Consistent with *in vitro* findings, *ex vivo* peripheral monocytes derived from RA patients  
294 had significantly increased phosphorylation of S6K and showed increased trend of intracellular pro-  
295 IL-1 $\beta$  (Fig. 7D and E). More importantly, PP2A activity of lysates, which were prepared from  
296 primary monocytes, was reduced in RA patients compared with HCs (Fig. 7F). This finding  
297 corroborates an increased activity of S6K in monocytes of RA patients (Fig. 7D). To further

298 investigate the relevance between Zip8 expression and S6K-mediated IL-1 $\beta$  production, we  
299 compared the clinical parameters, levels of MT2A expression, phosphorylation of S6K, and pro-IL-  
300 1 $\beta$  in monocytes derived from peripheral monocytes of patients sets with low or high Zip8  
301 expression . There was a significant increase in disease activity within the Zip8 high-expression  
302 group (Fig 7G). Moreover, RA monocytes with elevated Zip8 expression had significantly increased  
303 MT2A expression and phosphorylation of S6K, and showed increasing trend of intracellular pro-IL-  
304 1 $\beta$  (Fig. 7H-J). Together, these results suggest that the enhanced zinc influx by Zip8 in monocytes  
305 from RA patients plays a role in the regulation of inflammatory responses in RA.

306 **DISCUSSION**

307 Two different types of intracellular zinc signaling have been proposed during immune  
308 responses. The first type is mediated by a prompt increase of intracellular zinc upon extracellular  
309 stimulation as described in FcεR-stimulated mast cells and TCR-activated T cells(6, 7). In contrast,  
310 another type of zinc signaling is induced several hours after stimulation and depends on  
311 transcriptional changes in zinc transporter expression as depicted in LPS-stimulated dendritic cells  
312 (DCs) and TCR-activated T cells(18, 21, 48). In our study, zinc influx into human monocytes was  
313 found to be mediated within 10 min of LPS stimulation in a transcription-independent manner as  
314 previously reported (Fig. 2A and B)(8, 15). Meanwhile, the increase in cytoplasmic zinc is further  
315 exacerbated by LPS-mediated induction of Zip8 expression on the plasma membrane (Fig. 2C and  
316 D) and this leads to increased IL-1β production downstream of the mTORC1-S6K pathway (Fig. 3A,  
317 B, and 5B).

318 Intracellular zinc homeostasis is exquisitely governed by spatiotemporal expression of 14  
319 Zips and 10 ZnTs(12, 49). These transporters are located either in the plasma membrane or in the  
320 membrane of intracellular organelles where they act to modulate intracellular zinc ion by mediating  
321 its influx/efflux or release/sequestration, respectively(50). A limited number of transporters  
322 participate in the regulation of immune responses due to their tissue- or cell-specific expression. It  
323 has suggested pivotal immunoregulatory roles for Zip6 and Zip8 in T cells(6, 18). Our data illustrate  
324 that Zip1 and Zip8 are constitutively expressed by resting monocytes and macrophages. Moreover,  
325 Zip8 expression was found to be dramatically increased upon stimulation with LPS (Fig. 1C and D)  
326 as previously reported(38, 51). Knockdown of Zip8 via siRNA and real-time monitoring of zinc  
327 influx suggests Zip8 is a major mediator of zinc influx in human monocytes/macrophages (Fig. 2E  
328 and F). In addition to LPS, a variety of stimuli trigger Zip8 expression in several cell types. TNF-α



329 and IL-1 $\beta$  greatly increase Zip8 expression in mouse lung epithelial and articular chondrocytes(52),  
330 respectively. TCR-stimulated T cells and IL-5-treated B cells also display enhanced Zip8  
331 expression(18, 53), suggesting the critical role of this transporter for maintaining zinc homeostasis in  
332 cells exposed to the inflammatory milieu. Zip8 is a downstream target gene of NF- $\kappa$ B(38), and the  
333 re-analysis on our previous microarray data showed that expression of Zip8 is greatly upregulated in  
334 peripheral monocytes from RA patients when compared with those of healthy controls (Fig. 1A)  
335 (<https://www.ebi.ac.uk/arrayexpress/experiments/E-MTAB-6187/>).

336 RA is a prototype systemic autoimmune disease characterized by chronic inflammatory  
337 responses(54, 55). Accumulating evidence reveals that monocytes and macrophages play critical  
338 roles in the pathophysiology of RA via delivering enhanced costimulatory signaling producing pro-  
339 inflammatory cytokines(56). Moreover, it has shown that sustained hyper-inflammatory activity of  
340 glycolytic macrophages is a central parameter of RA (24, 47, 57), implying that metabolic  
341 reprogramming occurs in these cells. Our results indicate that the increase in intracellular zinc in  
342 response to Zip8 expression plays a role in inflammatory responses. Of note, peripheral and synovial  
343 monocytes of RA patients had higher mRNA expression of Zip8 and MT2A, compared with those of  
344 HCs. Considering the correlation among the mRNA expression of Zip8, MT2A, IL-1 $\beta$  of monocytes,  
345 and clinical parameters in patients (Fig. 7A and C), an enhanced zinc influx by monocytes from RA  
346 patients may play an important role in the regulation of their inflammatory responses. In contrast to a  
347 previous report and our findings(8), Lui *et al.* recently suggested that proinflammatory stimuli induce  
348 Zip8 expression in an NF- $\kappa$ B-dependent manner, resulting in zinc influx, while Zip8 negatively  
349 regulates the NF- $\kappa$ B pathway and proinflammatory responses through zinc-mediated suppression of  
350 I $\kappa$ B kinase (IKK) activity in monocytes and macrophages(38). This discrepancy in findings is likely  
351 due to the difference in cytoplasmic zinc ion levels between the two experimental systems. In our  
352 study zinc influx was caused by the increase of extracellular zinc, while in the Lui study the zinc

353 ionophore pyrithione was utilized to promote entry of zinc ions into cells and increase cytoplasmic  
354 zinc levels. Zinc inhibits IKK $\alpha$  and IKK $\beta$  with an IC<sub>50</sub> of approximately 0.5  $\mu$ M. In contrast, protein  
355 tyrosine phosphatases (PTPs) are sensitive to the inhibitory action of zinc ions with IC<sub>50</sub> values in  
356 the pM to low nM range, which is likely to be achieved *in vivo* (6). It should be noted that zinc  
357 appears to activate or inhibit several signaling pathways downstream of TLRs in human monocytes.  
358 These opposing effects are not mutually exclusive. Thus, zinc can be either pro or anti-inflammatory,  
359 depending on the concentration to which cells are exposed(37, 58).

360 Bioavailable zinc ions participate in regulation of many signaling pathways, and  
361 consequently, modulate immune responses(1, 40). Our data clearly illustrate that the activity of the  
362 Akt/mTOR pathway also depends on the cytoplasmic zinc concentration in human monocytes and  
363 macrophages as was previously well-depicted in the Erk1/2 pathway (Fig. 5A, B, and Suppl. Fig.  
364 4)(8). Zinc-mediated Akt activation has been reported in several cell types including lung epithelial  
365 cells and myogenic cells in which exogenous zinc facilitates cell survival and proliferation,  
366 respectively, via largely unclear mechanisms(59, 60). Despite its essential role in immune cells, few  
367 studies have investigated the modulation of the Akt/mTOR pathway by zinc. Plum et al. recently  
368 demonstrated that zinc ions augment interleukin-2-mediated Akt phosphorylation in both a murine T  
369 cell line and thymocytes, which is due to zinc-mediated inhibition of PTEN(61). In the present study,  
370 we found that cytoplasmic zinc ions greatly enhance the phosphorylation of S6 kinase, a downstream  
371 target of mTORC1 signaling (Fig. 5B). Since mTORC1-S6K signaling serves to promote aerobic  
372 glycolysis, which is intimately connected to inflammasome activation in innate cells, we  
373 hypothesized that zinc functions as an ionic signaling molecule for the mTORC1-S6K pathway.  
374 Although S6K is a distal downstream molecule in the Akt signaling pathway, our experiments using  
375 MK-2206, a selective Akt inhibitor, strongly suggest other mechanisms underlying the zinc-

376 dependent enhancement of S6K activity. Given that zinc is a potent inhibitor of many phosphatases,  
377 activation-dependent zinc influx may influence the activity of phosphatases directly targeting S6K.

378 Robust aerobic glycolysis is a hallmark of metabolic reprogramming in activated  
379 monocytes/macrophages, which is necessary to meet the demands of an immune response(24).  
380 Metabolic reprogramming of innate myeloid cells is particularly relevant for IL-1 $\beta$  production(24,  
381 26, 27). mTORC1 is a key player in glycolytic reprogramming, which involves the increased  
382 translation of glycolytic enzymes or their transcriptional regulators(27). Our study clearly shows that  
383 zinc influx in activated monocytes/macrophages leads to augmented IL-1 $\beta$  production *via* enhanced  
384 mTORC1 activity and glycolysis (Fig. 3,4, and 5). It has been demonstrated that metabolic shift  
385 toward glycolysis largely depends on glucose uptake, which is mainly mediated by activation-  
386 induced expression of Glut1 and glucose metabolism-related enzymes. Our recent studies also  
387 suggest that the activity of mTORC1, a central regulator of glycolysis, is regulated by the  
388 intracellular level of certain amino acids, including leucine and arginine, *via* their specific sensor  
389 proteins(24) and independently of glucose utilization. In LPS-stimulated murine macrophages,  
390 mTORC1-induced hexokinase 1 (HK1)-dependent glycolysis regulates NLRP3 inflammasome  
391 activation and augments IL-1 $\beta$  production(27). Thus, we sought to explore the mechanism  
392 underlying the direct regulation of mTORC1-S6K activity by cytoplasmic zinc.

393 Protein phosphorylation is a major and reversible posttranslational modification and  
394 precisely modulated by protein kinases and phosphatases. Zinc ions are recognized as inhibitors of  
395 protein tyrosine phosphatases (PTPs) that conserve tyrosine phosphorylation and generally sustain  
396 signaling activity(6) by yet unidentified mechanisms(62). A number of studies showed that zinc  
397 binds very tightly to PTPs with an IC<sub>50</sub> in the nanomolar to picomolar range. These free cytosolic  
398 zinc ion concentrations are likely achievable during signaling events in cells, thus suggesting zinc

399 modulates PTP activity *in vivo*(23). In addition to PTPs, zinc ions also inhibit activity of several  
400 serine/threonine phosphatases including calcineurin(18). Our findings in Figure 5 suggest that the  
401 zinc-mediated enhancement of S6K activity is dependent not only on upstream signaling events, such  
402 as Akt, but also on the activity of the protein phosphatases that regulate S6K activity. PP2A and  
403 PHLPP have been identified as phosphatases that control phosphorylation and activity of S6K(43,  
404 44, 63). Therefore, we sought to investigate whether zinc ions modulate PP2A and PHLPP activity in  
405 human monocytes/macrophages leading to changes in S6K activity.

406 PP2A is a highly conserved and ubiquitous serine/threonine phosphatase involved in many  
407 essential aspects of cellular function including cell cycle regulation, cell growth control, and signal  
408 transduction pathways(64, 65). The PP2A complex consists of three subunits, a structural regulatory  
409 subunit (A), a regulatory subunit (B), and a catalytic subunit (C). PP2A was initially identified as an  
410 important tumor suppressor protein due to its relationship with cell cycle and cell growth(66).  
411 However, accumulating evidence suggests involvement of PP2A in the control of inflammation. Treg  
412 cell-specific loss of PP2A leads to altered metabolic and cytokine profiles and impaired capability to  
413 suppress immune responses. Further, Th17 differentiation is dependent on PP2A, through its  
414 involvement in regulation of the canonical TGF $\beta$ -SMADs-ROR $\gamma$ t signaling process(42, 67). As seen  
415 in Figure 6B and C, LB-100, a small molecule inhibitor of the PP2A-C subunit, enhances  
416 phosphorylation of S6K and production of IL-1 $\beta$ , demonstrating that PP2A functions as a  
417 phosphatase regulating S6K activity. Early studies showed that THP-1, a human monocytic T cell  
418 line, constitutively expresses all three subunits of PP2A. In line with this, PP2A levels were  
419 unaffected by LPS stimulation in our study (Fig. 6A) and PP2A regulated JNK activity via a direct  
420 physical interaction in the context of an inflammatory stimulus. More recently, myeloid-specific  
421 deletion of PP2A-C $\alpha$  in murine BMDMs was found to intensify MyD88- and TRIF-dependent  
422 inflammation following LPS challenge, suggesting an important regulatory role of PP2A in many

423 aspects of inflammation and survival in activated myeloid cells (68). Of importance, studies have  
424 suggested that PP2A-B, the regulatory subunit, interacts with and dephosphorylates S6K, whose  
425 activity was found to be dramatically influenced by intracellular zinc concentration in the current  
426 study (Fig. 5). PP2A was found to physically interact with overexpressed S6K in 293 T cells and  
427 with endogenous S6K in primary human macrophages, similar to what was reported in  
428 *Drosophila*(44). Considering that phosphorylation of the PP2A-C subunit at Tyr307 is a negative  
429 indicator of PP2A activity (46, 69), our data suggest that the zinc-mediated enhancement of S6K  
430 activity is attributable to PP2A in monocytes/macrophages (Fig. 6F).

431 Our findings have clinical importance for the unchecked or prolonged mTORC1-induced  
432 glycolysis in several chronic inflammatory disorders(24). Activation-induced upregulation of Zip8  
433 expression and enhanced zinc influx could explain metabolic shift to glycolysis seen in monocytes  
434 from patients with RA. Considering the correlation between MT2A and IL-1 $\beta$  levels in circulating  
435 monocytes of RA patients (Fig. 7), Zip8-mediated zinc influx by monocytes and macrophages could  
436 be an important role for pathogenesis of chronic inflammatory disorders. Thus, Zip8 may be a  
437 potential therapeutic target for a variety of inflammatory disorders

438 In conclusion, we provide evidence that cytoplasmic bioavailable zinc is important for  
439 modulation of IL-1 $\beta$  production in human monocytes and macrophages. Upon stimulation,  
440 cytoplasmic levels of bioavailable zinc in these cells is largely influenced by extracellular zinc  
441 concentrations, in part *via* Zip8-mediated influx. The phosphorylation of S6 kinase is enhanced and  
442 maintained under increased zinc concentrations via zinc-mediated inhibition of PP2A, an S6K  
443 phosphatase, and as a result, IL-1 $\beta$  production is increased by activated mTORC1-induced  
444 glycolysis. In RA patients, the expression of Zip8 and MT2A by peripheral and synovial monocytes  
445 was significantly increased and their Zip8 levels positively correlated with RA clinical parameters,

446 suggesting that Zip8-mediated zinc influx is related to inflammatory conditions. Our data provide  
447 new insight into how bioavailable zinc modulates cytokine production in human  
448 monocytes/macrophages *via* metabolic reprogramming which is an essential process for  
449 inflammatory responses.

## 450 **Materials and Methods**

### 451 **Cell preparation**

452 The study protocols were approved by the institutional review board of Seoul National University  
453 Hospital, Chungnam National University Hospital, and Severance Hospital, Yonsei University Health  
454 System. Peripheral blood of RA patients and healthy donors was drawn after obtaining written,  
455 informed consent. The methods were performed in accordance with the approved guidelines.  
456 Peripheral blood mononuclear cells (PBMCs) were isolated from blood by density gradient  
457 centrifugation (Bicoll separating solution; BIOCHROM Inc., Cambridge, UK). Monocytes were  
458 positively separated from PBMCs with anti-CD14 magnetic microbeads (Miltenyi Biotec Inc., Auburn,  
459 CA, USA).

### 460 **Cell culture**

461 Purified monocytes were cultured in serum free RPMI 1640 medium supplemented with 1%  
462 penicillin/streptomycin and 1% L-glutamine. Human monocyte-derived macrophages (HMDMs)  
463 were differentiated from purified CD14<sup>+</sup> monocytes in the presence of recombinant human M-CSF  
464 (50 ng/ml; PeproTech, Cranbury, NJ, USA) for 6 days in RPMI 1640 medium supplemented with  
465 10% FBS, 1% penicillin/streptomycin and 1% L-glutamine.

### 466 **Antibodies and reagents.**

467 LPS, TPEN (N,N,N',N'-tetrakis-(2-pyridyl-methyl)ethylenediamine), ATP, Glucose, oligomycin, 2-  
468 DG (2-deoxy-D-glucose), and Okadaic acid were obtained from MilliporeSigma (Burlington, MA,  
469 USA). LB100, PP2A-specific small molecule inhibitor, was purchased from Selleckchem  
470 (Houston, TX, USA). Anti-IL-1 $\beta$ , anti-caspase 1, anti-phospho p70 S6 Kinase (Thr389), anti-p70

471 S6K, anti-phospho mTOR (Ser2448), anti-mTOR, anti-phospho Akt (Ser308 and Ser473), anti-Akt,  
472 anti-phospho 4EBP1 (Ser65), anti-4EBP1, anti-phospho NF- $\kappa$ B p65 (Ser536), anti-NF- $\kappa$ B p65, anti-  
473 phospho ERK (Thr202/Tyr204), anti-ERK, anti-phospho p38 (Thr180/Tyr182), anti-p38, and anti-  
474 PP2A-B subunit antibodies (Abs) were purchased from Cell Signaling Technology (Danvers, MA,  
475 USA). Anti-PP2A-C and anti- $\beta$ -actin Ab was obtained from MilliporeSigma (Burlington, MA, USA).  
476 Phospho-PP2A-C (Tyr307) Abs were purchased from Santacruz (Dallas, Texas, USA), respectively.

#### 477 **Enzyme-Linked Immunosorbent Assay (ELISA)**

478 The amount of IL-1 $\beta$ , TNF- $\alpha$  and IL-6 in culture supernatant was quantified by commercial ELISA  
479 kits (Thermo Fisher Scientific, Waltham, MA, USA). The measurement of OD (Optical density) was  
480 performed using the infinite 200 pro multimode microplate reader (Tecan Group Ltd., Seestrasse,  
481 Switzerland).

#### 482 **Immunoblot Analysis**

483 Monocytes and macrophages were lysed in RIPA lysis buffer (150 mM NaCl, 10 mM Na<sub>2</sub>HPO<sub>4</sub>, pH  
484 7.2, 1% Nonidet P-40, and 0.5% deoxycholate) containing PMSF (phenylmethylsulfonyl fluoride)  
485 (MilliporeSigma), EDTA, and protease and phosphatase inhibitor cocktail (Thermo Fisher scientific).  
486 Proteins from supernatants were precipitated using methanol/chloroform. Cell lysates were separated  
487 on 8-12% SDS-PAGE gel and transferred onto a PVDF membrane (Bio-Rad, Hercules, CA, USA).  
488 The membrane was incubated overnight with the respective primary antibodies at 4 °C, and then  
489 incubated with peroxidase-conjugated secondary Abs for 1 h (Cell signaling) for 1 h at room  
490 temperature. The membranes were developed by ECL system.

#### 491 **Immunoprecipitation**



492 Cell lysates were prepared using modified RIPA buffer (50 mM Tris-HCl, pH 7.4, 150 mM NaCl, 1%  
493 Nonidet P-40, and 0.25% deoxycholate) containing PMSF, EDTA, and protease and phosphatase  
494 inhibitor cocktail. Cell lysates (500 µg) were incubated with target antibodies at 4°C for overnight  
495 and immunoprecipitated with protein A/G plus agarose beads (Santacruz) for 2 hr at 4°C.

#### 496 **RT-PCR**

497 Total RNA was extracted from freshly isolated or cultured cells using TRIzol reagents (life  
498 technologies, Grand Island, NY, USA), and cDNA was synthesized by GoScript reverse transcription  
499 system (Promega, Madison, WI, USA). Real-time quantitative RT-PCR was performed in duplicates  
500 on a CFX Automation System (Bio-rad). The levels of gene expression were normalized to the  
501 expression of β-actin. The comparative Ct method ( $\Delta\Delta C_t$ ) was used for the quantification of gene  
502 expression.

#### 503 **Intracellular zinc measurements with fluorescent probes**

504 Cells were incubated in loading buffer [HBBS (-), 1 mM Ca<sup>2+</sup>, 1 mM Mg<sup>2+</sup>, 0.5% BSA] for 30 min,  
505 either with 1 µM FluoZin-3-AM (Thermo Fisher scientific) at 37°C. After cells were washed twice  
506 with washing buffer [PBS + 10% Bovine Serum + 1% Penicillin/Streptomycin], the fluorescence  
507 was recorded on infinite 200 pro multimode microplate reader using excitation and emission  
508 wavelengths of 485 and 535 nm. The concentration of intracellular zinc was calculated from the  
509 mean fluorescence with the formula  $[Zn] = Kd \times [(F - F_{min}) / (F_{max} - F)]$ , using 50 µM TPEN to  
510 determine minimal fluorescence and 100 µM ZnCl<sub>2</sub>/50 µM pyrithione to determine maximal  
511 fluorescence, respectively (70).

#### 512 **Metabolic Analysis**

513 Human primary monocytes and macrophages were pre-treated with TPEN 1.5  $\mu$ M or ZnCl<sub>2</sub> (0 and  
514 45  $\mu$ M) and stimulated with 10 or 100 ng/ml LPS for 24 h in RPMI 1640 medium supplemented with  
515 10% fetal bovine serum, 1% penicillin/streptomycin, and 1% l-glutamine. To measure cellular  
516 respiration activity of the cells, monocytes were seeded as a monolayer onto XFe24 cell culture  
517 plates (Seahorse Bioscience, MA, USA). The culture media was replaced with XF assay media  
518 supplemented with l-glutamine (250  $\mu$ g/ml) and incubated for 1 h in non-CO<sub>2</sub> incubator. Glucose (10  
519 mM), oligomycin (2  $\mu$ M), and 2-DG (50 mM) were sequentially treated into the cells during real-  
520 time measurements of extracellular acidification rate (ECAR) and Oxygen consumption rate (OCR)  
521 using XFe24 analyzer. Glycolysis parameters were calculated using XF glycolysis stress test report  
522 generator program that was provided from manufacturer (Seahorse Bioscience). Glycolysis and  
523 glycolysis capacity were calculated by subtracting ECAR after glucose treatment from ECAR before  
524 oligomycin and subtracting ECAR after oligomycin from ECAR before 2-DG treatment,  
525 respectively.

#### 526 **Lactate production assay**

527 The lactate production is measured using colorimetric assay (BioVision Technologies, Milpitas, CA,  
528 USA), according to the manufacturer's instructions. Absorbance was measured using infinite 200 pro  
529 multimode microplate reader at 570 nm.

#### 530 **Zinc assay**

531 Zinc levels were estimated using a commercially available zinc assay kit (MilliporeSigma),  
532 according to the manufacturer's instructions. Absorbance was measured using infinite 200 pro  
533 multimode microplate reader at 560 nm.

#### 534 **Phosphatase assay**

535 PP2A activity in cell lysates was measured using the Phosphatase Assay Kit (Promega). Endogenous  
536 free phosphate was removed using the columns, and then the extracts were normalized for protein  
537 content. Lysates (5  $\mu$ g) were incubated with diverse ZnCl<sub>2</sub> or PP2A inhibitors for 30 min at 30 °C  
538 using a Thermo-mixer (Eppendorf, Hamburg, Germany). The protein samples were incubated for 30  
539 min at 33 °C with a chemically synthesized phosphopeptide [RRA(pT)VA], as a substrate for PP2A,  
540 PP2B, and PP2C, not for PP1 in optimized buffer for PP2A activity while cation-dependent PP2B  
541 and PP2C were inhibited. Released phosphate from substrate was detected by adding an equal  
542 volume of the Molybdate Dye/Additive mixture for 15 min at 630 nm. PP2A activity was calculated  
543 by the release of phosphate per  $\mu$ g of protein and per minute (pmol/ $\mu$ g/min), according to the  
544 manufacturer's instructions.

#### 545 **Statistics**

546 A paired t-test, unpaired t-test, or Pearson correlation analysis was done to analyze data using Prism 7  
547 software (GraphPad Software Inc., La Jolla, CA, USA) as indicated in the figure legends. *p* -values of  
548 less than 0.05 were considered statistically significant.

549 **SUPPLEMENTARY MATERIALS**

550 **Supplementary Figure 1.** Enhanced expression of zinc transporter Zip8 in monocytes derived in  
551 synovial fluid (SF) of RA patients compared to those in their peripheral blood.

552 **Supplementary Figure 2.** Knockdown of Zip8 in human monocyte-derived macrophages (HMDMs).

553 **Supplementary Figure 3.** Effect of zinc on production of proinflammatory cytokines.

554 **Supplementary Figure 4.** Increased intracellular zinc leads to upregulated phosphorylation of  
555 Akt/mTORC1 signaling pathway molecules.

556 **Supplementary Figure 5.** Role of PP2A in zinc-mediated regulation of S6K activity in human  
557 monocytes.

558 **Supplementary Figure 6.** PHLPP does not play a role in zinc-mediated regulation of S6K activity in  
559 human monocytes and macrophages.

560 **Supplementary Figure 7.** Clinical relevance of zinc-mediated metabolic reprogramming in monocytes  
561 of RA patients.

562 **REFERENCES**

- 563 1. H. Haase, L. Rink, Functional significance of zinc-related signaling pathways in immune  
564 cells. *Annu Rev Nutr.* **29**, 133-152 (2009).
- 565 2. W. Maret, Zinc biochemistry: from a single zinc enzyme to a key element of life. *Adv Nutr.* **4**,  
566 82-91 (2013).
- 567 3. C. Andreini, L. Banci, I. Bertini, A. Rosato, Counting the zinc-proteins encoded in the human  
568 genome. *J Proteome Res.* **5**, 196-201 (2006).
- 569 4. J. E. Coleman, Zinc proteins: enzymes, storage proteins, transcription factors, and replication  
570 proteins. *Annu Rev Biochem.* **61**, 897-946 (1992).
- 571 5. T. Hirano, M. Murakami, T. Fukada, K. Nishida, S. Yamasaki, T. Suzuki, Roles of zinc and  
572 zinc signaling in immunity: zinc as an intracellular signaling molecule. *Adv Immunol.* **97**,  
573 149-176 (2008).
- 574 6. M. Yu, W. W. Lee, D. Tomar, S. Pryshchep, M. Czesnikiewicz-Guzik, D. L. Lamar, G. Li, K.  
575 Singh, L. Tian, C. M. Weyand, J. J. Goronzy, Regulation of T cell receptor signaling by  
576 activation-induced zinc influx. *J Exp Med.* **208**, 775-785 (2011).
- 577 7. S. Yamasaki, K. Sakata-Sogawa, A. Hasegawa, T. Suzuki, K. Kabu, E. Sato, T. Kurosaki, S.  
578 Yamashita, M. Tokunaga, K. Nishida, T. Hirano, Zinc is a novel intracellular second  
579 messenger. *J Cell Biol.* **177**, 637-645 (2007).
- 580 8. H. Haase, J. L. Ober-Blobaum, G. Engelhardt, S. Hebel, A. Heit, H. Heine, L. Rink, Zinc  
581 signals are essential for lipopolysaccharide-induced signal transduction in monocytes. *J*  
582 *Immunol.* **181**, 6491-6502 (2008).
- 583 9. A. S. Prasad, Discovery of human zinc deficiency: its impact on human health and disease.  
584 *Adv Nutr.* **4**, 176-190 (2013).
- 585 10. B. Szewczyk, Zinc homeostasis and neurodegenerative disorders. *Front Aging Neurosci.* **5**,  
586 33 (2013).
- 587 11. H. Haase, L. Rink, The immune system and the impact of zinc during aging. *Immun Ageing.*  
588 **6**, 9 (2009).
- 589 12. L. A. Lichten, R. J. Cousins, Mammalian zinc transporters: nutritional and physiologic  
590 regulation. *Annu Rev Nutr.* **29**, 153-176 (2009).
- 591 13. P. Bonaventura, G. Benedetti, F. Albareda, P. Miossec, Zinc and its role in immunity and  
592 inflammation. *Autoimmun Rev.* **14**, 277-285 (2015).
- 593 14. D. Brough, P. Pelegrin, N. J. Rothwell, Pannexin-1-dependent caspase-1 activation and  
594 secretion of IL-1 $\beta$  is regulated by zinc. *Eur J Immunol.* **39**, 352-358 (2009).
- 595 15. A. Brieger, L. Rink, H. Haase, Differential regulation of TLR-dependent MyD88 and TRIF  
596 signaling pathways by free zinc ions. *J Immunol.* **191**, 1808-1817 (2013).
- 597 16. H. Summersgill, H. England, G. Lopez-Castejon, C. B. Lawrence, N. M. Luheshi, J. Pahle, P.  
598 Mendes, D. Brough, Zinc depletion regulates the processing and secretion of IL-1 $\beta$ . *Cell*  
599 *Death Dis.* **5**, e1040 (2014).
- 600 17. C. Anzilotti, D. J. Swan, B. Boisson, M. Deobagkar-Lele, C. Oliveira, P. Chabosseau, K. R.  
601 Engelhardt, X. Xu, R. Chen, L. Alvarez, R. Berlinguer-Palmini, K. R. Bull, E. Cawthorne, A.  
602 P. Cribbs, T. L. Crockford, T. S. Dang, A. Fearn, E. J. Fenech, S. J. De Jong, B. C.  
603 Lagerholm, C. S. Ma, D. Sims, B. Van Den Berg, Y. Xu, A. J. Cant, G. Kleiner, T. R. Leahy,  
604 M. T. De La Morena, J. M. Puck, R. S. Shapiro, M. Van Der Burg, J. R. Chapman, J. C.  
605 Christianson, B. Davies, J. A. Mcgrath, S. Przyborski, M. Santibanez Koref, S. G. Tangye, A.  
606 Werner, G. A. Rutter, S. Padilla-Parra, J. L. Casanova, R. J. Cornall, M. E. Conley, S.  
607 Hambleton, An essential role for the Zn(2+) transporter ZIP7 in B cell development. *Nat*  
608 *Immunol.* **20**, 350-361 (2019).

- 609 18. T. B. Aydemir, J. P. Liuzzi, S. McClellan, R. J. Cousins, Zinc transporter ZIP8 (SLC39A8) and  
610 zinc influence IFN-gamma expression in activated human T cells. *J Leukoc Biol.* **86**, 337-348  
611 (2009).
- 612 19. S. Hojyo, T. Miyai, H. Fujishiro, M. Kawamura, T. Yasuda, A. Hijikata, B. H. Bin, T. Irie, J.  
613 Tanaka, T. Atsumi, M. Murakami, M. Nakayama, O. Ohara, S. Himeno, H. Yoshida, H.  
614 Koseki, T. Ikawa, K. Mishima, T. Fukada, Zinc transporter SLC39A10/ZIP10 controls  
615 humoral immunity by modulating B-cell receptor signal strength. *Proc Natl Acad Sci U S A.*  
616 **111**, 11786-11791 (2014).
- 617 20. K. Subramanian Vignesh, J. A. Landero Figueroa, A. Porollo, S. Divanovic, J. A. Caruso, G.  
618 S. Deepe, Jr., IL-4 Induces Metallothionein 3- and SLC30A4-Dependent Increase in  
619 Intracellular Zn(2+) that Promotes Pathogen Persistence in Macrophages. *Cell Rep.* **16**, 3232-  
620 3246 (2016).
- 621 21. H. Kitamura, H. Morikawa, H. Kamon, M. Iguchi, S. Hojyo, T. Fukada, S. Yamashita, T.  
622 Kaisho, S. Akira, M. Murakami, T. Hirano, Toll-like receptor-mediated regulation of zinc  
623 homeostasis influences dendritic cell function. *Nat Immunol.* **7**, 971-977 (2006).
- 624 22. H. Haase, W. Maret, Intracellular zinc fluctuations modulate protein tyrosine phosphatase  
625 activity in insulin/insulin-like growth factor-1 signaling. *Exp Cell Res.* **291**, 289-298 (2003).
- 626 23. E. Bellomo, A. Massarotti, C. Hogstrand, W. Maret, Zinc ions modulate protein tyrosine  
627 phosphatase 1B activity. *Metallomics.* **6**, 1229-1239 (2014).
- 628 24. B. R. Yoon, Y. J. Oh, S. W. Kang, E. B. Lee, W. W. Lee, Role of SLC7A5 in Metabolic  
629 Reprogramming of Human Monocyte/Macrophage Immune Responses. *Frontiers in*  
630 *immunology.* **9**, 53 (2018).
- 631 25. C. Auffray, M. H. Sieweke, F. Geissmann, Blood monocytes: development, heterogeneity, and  
632 relationship with dendritic cells. *Annu Rev Immunol.* **27**, 669-692 (2009).
- 633 26. G. M. Tannahill, A. M. Curtis, J. Adamik, E. M. Palsson-Mcdermott, A. F. McGettrick, G.  
634 Goel, C. Frezza, N. J. Bernard, B. Kelly, N. H. Foley, L. Zheng, A. Gardet, Z. Tong, S. S.  
635 Jany, S. C. Corr, M. Haneklaus, B. E. Caffrey, K. Pierce, S. Walmsley, F. C. Beasley, E.  
636 Cummins, V. Nizet, M. Whyte, C. T. Taylor, H. Lin, S. L. Masters, E. Gottlieb, V. P. Kelly, C.  
637 Clish, P. E. Auron, R. J. Xavier, L. A. O'Neill, Succinate is an inflammatory signal that induces  
638 IL-1beta through HIF-1alpha. *Nature.* **496**, 238-242 (2013).
- 639 27. J. S. Moon, S. Hisata, M. A. Park, G. M. Denicola, S. W. Ryter, K. Nakahira, A. M. K. Choi,  
640 mTORC1-Induced HK1-Dependent Glycolysis Regulates NLRP3 Inflammasome Activation.  
641 *Cell Rep.* **12**, 102-115 (2015).
- 642 28. T. Weichhart, M. Hengstschlager, M. Linke, Regulation of innate immune cell function by  
643 mTOR. *Nat Rev Immunol.* **15**, 599-614 (2015).
- 644 29. F. Liote, B. Boval-Boizard, D. Weill, D. Kuntz, J. L. Wautier, Blood monocyte activation in  
645 rheumatoid arthritis: increased monocyte adhesiveness, integrin expression, and cytokine  
646 release. *Clin Exp Immunol.* **106**, 13-19 (1996).
- 647 30. I. Torsteinsdottir, N. G. Arvidson, R. Hallgren, L. Hakansson, Monocyte activation in  
648 rheumatoid arthritis (RA): increased integrin, Fc gamma and complement receptor expression  
649 and the effect of glucocorticoids. *Clin Exp Immunol.* **115**, 554-560 (1999).
- 650 31. M. Rossol, S. Kraus, M. Pierer, C. Baerwald, U. Wagner, The CD14(bright) CD16+ monocyte  
651 subset is expanded in rheumatoid arthritis and promotes expansion of the Th17 cell  
652 population. *Arthritis Rheum.* **64**, 671-677 (2012).
- 653 32. S. Hojyo, T. Fukada, Roles of Zinc Signaling in the Immune System. *J Immunol Res.* **2016**,  
654 6762343 (2016).
- 655 33. S. R. Davis, R. J. Cousins, Metallothionein expression in animals: a physiological perspective  
656 on function. *J Nutr.* **130**, 1085-1088 (2000).

- 657 34. T. Shirai, R. R. Nazarewicz, B. B. Wallis, R. E. Yanes, R. Watanabe, M. Hilhorst, L. Tian, D.  
658 G. Harrison, J. C. Giacomini, T. L. Assimes, J. J. Goronzy, C. M. Weyand, The glycolytic  
659 enzyme PKM2 bridges metabolic and inflammatory dysfunction in coronary artery disease. *J*  
660 *Exp Med.* **213**, 337-354 (2016).
- 661 35. M. Xie, Y. Yu, R. Kang, S. Zhu, L. Yang, L. Zeng, X. Sun, M. Yang, T. R. Billiar, H. Wang, L.  
662 Cao, J. Jiang, D. Tang, PKM2-dependent glycolysis promotes NLRP3 and AIM2  
663 inflammasome activation. *Nat Commun.* **7**, 13280 (2016).
- 664 36. A. J. Freerman, A. R. Johnson, G. N. Sacks, J. J. Milner, E. L. Kirk, M. A. Troester, A. N.  
665 Macintyre, P. Goraksha-Hicks, J. C. Rathmell, L. Makowski, Metabolic reprogramming of  
666 macrophages: glucose transporter 1 (GLUT1)-mediated glucose metabolism drives a  
667 proinflammatory phenotype. *J Biol Chem.* **289**, 7884-7896 (2014).
- 668 37. H. Haase, L. Rink, Signal transduction in monocytes: the role of zinc ions. *Biometals.* **20**,  
669 579-585 (2007).
- 670 38. M. J. Liu, S. Bao, M. Galvez-Peralta, C. J. Pyle, A. C. Rudawsky, R. E. Pavlovicz, D. W.  
671 Killilea, C. Li, D. W. Nebert, M. D. Wewers, D. L. Knoell, ZIP8 regulates host defense  
672 through zinc-mediated inhibition of NF-kappaB. *Cell Rep.* **3**, 386-400 (2013).
- 673 39. H. Gao, W. Dai, L. Zhao, J. Min, F. Wang, The Role of Zinc and Zinc Homeostasis in  
674 Macrophage Function. *J Immunol Res.* **2018**, 6872621 (2018).
- 675 40. Y. Wan, M. J. Petris, S. C. Peck, Separation of zinc-dependent and zinc-independent events  
676 during early LPS-stimulated TLR4 signaling in macrophage cells. *FEBS Lett.* **588**, 2928-2935  
677 (2014).
- 678 41. A. J. Covarrubias, H. I. Aksoylar, T. Horng, Control of macrophage metabolism and activation  
679 by mTOR and Akt signaling. *Semin Immunol.* **27**, 286-296 (2015).
- 680 42. S. A. Apostolidis, N. Rodriguez-Rodriguez, A. Suarez-Fueyo, N. Dioufa, E. Ozcan, J. C.  
681 Crispin, M. G. Tsokos, G. C. Tsokos, Phosphatase PP2A is requisite for the function of  
682 regulatory T cells. *Nat Immunol.* **17**, 556-564 (2016).
- 683 43. J. Liu, P. D. Stevens, X. Li, M. D. Schmidt, T. Gao, PHLPP-mediated dephosphorylation of  
684 S6K1 inhibits protein translation and cell growth. *Mol Cell Biol.* **31**, 4917-4927 (2011).
- 685 44. K. Hahn, M. Miranda, V. A. Francis, J. Vendrell, A. Zorzano, A. A. Teleanu, PP2A regulatory  
686 subunit PP2A-B' counteracts S6K phosphorylation. *Cell Metab.* **11**, 438-444 (2010).
- 687 45. V. Janssens, S. Longin, J. Goris, PP2A holoenzyme assembly: in cauda venenum (the sting is  
688 in the tail). *Trends Biochem Sci.* **33**, 113-121 (2008).
- 689 46. J. Chen, B. L. Martin, D. L. Brautigan, Regulation of protein serine-threonine phosphatase  
690 type-2A by tyrosine phosphorylation. *Science.* **257**, 1261-1264 (1992).
- 691 47. C. M. Weyand, M. Zeisbrich, J. J. Goronzy, Metabolic signatures of T-cells and macrophages  
692 in rheumatoid arthritis. *Curr Opin Immunol.* **46**, 112-120 (2017).
- 693 48. W. W. Lee, D. Cui, M. Czesnikiewicz-Guzik, R. Z. Vencio, I. Shmulevich, A. Aderem, C. M.  
694 Weyand, J. J. Goronzy, Age-dependent signature of metallothionein expression in primary  
695 CD4 T cell responses is due to sustained zinc signaling. *Rejuvenation Res.* **11**, 1001-1011  
696 (2008).
- 697 49. T. Kambe, A. Hashimoto, S. Fujimoto, Current understanding of ZIP and ZnT zinc  
698 transporters in human health and diseases. *Cell Mol Life Sci.* **71**, 3281-3295 (2014).
- 699 50. S. Feske, H. Wulff, E. Y. Skolnik, Ion channels in innate and adaptive immunity. *Annu Rev*  
700 *Immunol.* **33**, 291-353 (2015).
- 701 51. N. A. Begum, M. Kobayashi, Y. Moriwaki, M. Matsumoto, K. Toyoshima, T. Seya,  
702 Mycobacterium bovis BCG cell wall and lipopolysaccharide induce a novel gene, BIGM103,  
703 encoding a 7-TM protein: identification of a new protein family having Zn-transporter and  
704 Zn-metalloprotease signatures. *Genomics.* **80**, 630-645 (2002).

- 705 52. J. H. Kim, J. Jeon, M. Shin, Y. Won, M. Lee, J. S. Kwak, G. Lee, J. Rhee, J. H. Ryu, C. H.  
706 Chun, J. S. Chun, Regulation of the catabolic cascade in osteoarthritis by the zinc-ZIP8-MTF1  
707 axis. *Cell*. **156**, 730-743 (2014).
- 708 53. K. Horikawa, K. Takatsu, Interleukin-5 regulates genes involved in B-cell terminal  
709 maturation. *Immunology*. **118**, 497-508 (2006).
- 710 54. I. B. McInnes, J. R. O'dell, State-of-the-art: rheumatoid arthritis. *Ann Rheum Dis*. **69**, 1898-  
711 1906 (2010).
- 712 55. I. B. McInnes, G. Schett, The pathogenesis of rheumatoid arthritis. *N Engl J Med*. **365**, 2205-  
713 2219 (2011).
- 714 56. B. R. Yoon, Y. H. Chung, S. J. Yoo, K. Kawara, J. Kim, I. S. Yoo, C. G. Park, S. W. Kang, W.  
715 W. Lee, Preferential Induction of the T Cell Auxiliary Signaling Molecule B7-H3 on Synovial  
716 Monocytes in Rheumatoid Arthritis. *J Biol Chem*. **291**, 4048-4057 (2016).
- 717 57. I. B. McInnes, G. Schett, Cytokines in the pathogenesis of rheumatoid arthritis. *Nat Rev*  
718 *Immunol*. **7**, 429-442 (2007).
- 719 58. V. Von Bulow, L. Rink, H. Haase, Zinc-mediated inhibition of cyclic nucleotide  
720 phosphodiesterase activity and expression suppresses TNF-alpha and IL-1 beta production in  
721 monocytes by elevation of guanosine 3',5'-cyclic monophosphate. *J Immunol*. **175**, 4697-  
722 4705 (2005).
- 723 59. S. Bao, D. L. Knoell, Zinc modulates airway epithelium susceptibility to death receptor-  
724 mediated apoptosis. *Am J Physiol Lung Cell Mol Physiol*. **290**, L433-441 (2006).
- 725 60. K. Ohashi, Y. Nagata, E. Wada, P. S. Zammit, M. Shiozuka, R. Matsuda, Zinc promotes  
726 proliferation and activation of myogenic cells via the PI3K/Akt and ERK signaling cascade.  
727 *Exp Cell Res*. **333**, 228-237 (2015).
- 728 61. L. M. Plum, A. Brieger, G. Engelhardt, S. Hebel, A. Nessel, M. Arlt, J. Kaltenberg, U.  
729 Schwaneberg, M. Huber, L. Rink, H. Haase, PTEN-inhibition by zinc ions augments  
730 interleukin-2-mediated Akt phosphorylation. *Metallomics*. **6**, 1277-1287 (2014).
- 731 62. W. Maret, Zinc in Cellular Regulation: The Nature and Significance of "Zinc Signals". *Int J*  
732 *Mol Sci*. **18**, (2017).
- 733 63. R. S. Westphal, R. L. Coffee, Jr., A. Marotta, S. L. Pelech, B. E. Wadzinski, Identification of  
734 kinase-phosphatase signaling modules composed of p70 S6 kinase-protein phosphatase 2A  
735 (PP2A) and p21-activated kinase-PP2A. *J Biol Chem*. **274**, 687-692 (1999).
- 736 64. Y. Xu, Y. Xing, Y. Chen, Y. Chao, Z. Lin, E. Fan, J. W. Yu, S. Strack, P. D. Jeffrey, Y. Shi,  
737 Structure of the protein phosphatase 2A holoenzyme. *Cell*. **127**, 1239-1251 (2006).
- 738 65. V. Janssens, J. Goris, Protein phosphatase 2A: a highly regulated family of serine/threonine  
739 phosphatases implicated in cell growth and signalling. *Biochem J*. **353**, 417-439 (2001).
- 740 66. V. Janssens, J. Goris, C. Van Hoof, PP2A: the expected tumor suppressor. *Curr Opin Genet*  
741 *Dev*. **15**, 34-41 (2005).
- 742 67. Q. Xu, X. Jin, M. Zheng, D. Rohila, G. Fu, Z. Wen, J. Lou, S. Wu, R. Sloan, L. Wang, H. Hu,  
743 X. Gao, L. Lu, Phosphatase PP2A is essential for TH17 differentiation. *Proc Natl Acad Sci U*  
744 *S A*. **116**, 982-987 (2019).
- 745 68. L. Sun, T. T. Pham, T. T. Cornell, K. L. McDonough, W. M. Mchugh, N. B. Blatt, M. K.  
746 Dahmer, T. P. Shanley, Myeloid-Specific Gene Deletion of Protein Phosphatase 2A Magnifies  
747 MyD88- and TRIF-Dependent Inflammation following Endotoxin Challenge. *J Immunol*.  
748 **198**, 404-416 (2017).
- 749 69. R. Liu, X. W. Zhou, H. Tanila, C. Bjorkdahl, J. Z. Wang, Z. Z. Guan, Y. Cao, J. A.  
750 Gustafsson, B. Winblad, J. J. Pei, Phosphorylated PP2A (tyrosine 307) is associated with  
751 Alzheimer neurofibrillary pathology. *J Cell Mol Med*. **12**, 241-257 (2008).
- 752 70. H. Haase, S. Hebel, G. Engelhardt, L. Rink, Flow cytometric measurement of labile zinc in



753 peripheral blood mononuclear cells. *Anal Biochem.* **352**, 222-230 (2006).

754 **ACKNOWLEDGMENTS:** The authors thank Jiyeon Jang (Seoul National University College of  
755 Medicine) for assisting in the recruitment of human subjects and thank Core Lab, Clinical Trials Center,  
756 Seoul National University Hospital for drawing blood.

757 **FUNDING:** This work was supported in part by grants (Grant no: 2013R1A1A2012522 and NRF-  
758 2018R1A2B2006310 to W.W. Lee) from the National Research Foundation of Korea (NRF) funded  
759 by Ministry of Science and ICT (MSIT), Republic of Korea.

760 **AUTHOR CONTRIBUTIONS:** B.K: participated in the design of the study, performed most of the  
761 experiments, data collection and analysis, and drafted manuscript. H.Y.K. and B.R.Y.: participated in  
762 the design of the study, performed the experiments, data collection and analysis. J.Y., K.-S.Y., H.C.K.,  
763 J.K.P. and S.W.K.: participated in its design and performed data analysis. W-W.L.: conceived of the  
764 study, participated in its design and coordination, performed data analysis and writing of manuscript,  
765 and has full access to all the data in this study and financial support. All authors have read and approved  
766 the final manuscript.

767 **COMPETING INTERESTS:** The authors have declared that no conflict of interest exists

768 **FIGURE LEGENDS**

769 **Figure 1. Enhanced expression of zinc transporter Zip8 in monocytes of patients with RA and**  
770 **activated monocytes/macrophages of HCs. (A)** Microarray analysis on 10 SLC30A (ZnT) and 14  
771 SLC39A (Zip) transporters expressed by peripheral monocytes. CD14<sup>+</sup> monocytes were purified from  
772 peripheral blood mononuclear cells of RA patients ( $n=3$ ) and healthy controls (HCs) ( $n=2$ ). **(B)**  
773 Quantitative PCR analysis of Zip8 gene expression by peripheral monocytes derived from HC ( $n=13$ )  
774 and RA patients ( $n=32$ ). Expression was normalized to  $\beta$ -actin, and the comparative Ct method was  
775 used for the quantification of gene expression. **(C-D)** mRNA levels of 14 Zip family genes were  
776 quantified by real-time RT-PCR in monocytes (C) ( $n=7$ ) and macrophages (D)( $n=5$ ) stimulated with  
777 or without LPS for 24 hr. Relative expression of mRNA of ZIP family genes was normalized to Zip8  
778 without LPS. Bar graphs and scatter plots show the mean  $\pm$  SEM. \* =  $p < 0.05$  by two-tailed paired  $t$ -  
779 test.

780 **Figure 2. Zinc influx is dependent on extracellular zinc levels and occurs via Zip8 transporters.**  
781 **(A-B)** Intracellular zinc was measured in human monocytes (A) and macrophages (B) loaded with  
782 FluoZin-3. After recording the baseline fluorescence for 10 min, different concentrations of ZnCl<sub>2</sub>  
783 were added into the cells (arrow) and the FluoZin-3 signal was recorded for an additional 50 min.  
784 The concentration of zinc ions was calculated as described in Material and Methods. A representative  
785 experiment (mean of triplicates  $\pm$  SD) of three independent experiments is shown. **(C-D)** MT2A  
786 mRNA level was quantified by qRT-PCR in monocytes (C) ( $n=5$ ) and macrophages (D) ( $n=4$ )  
787 stimulated with LPS. **(E-F)** Macrophages were transfected with Zip8-targeted or control siRNA and  
788 then incubated with ZnCl<sub>2</sub> for 2 hr, followed by stimulation with LPS (10 ng/ml) for 24 hr. (E) Influx  
789 of zinc ions was monitored by FluoZin-3. (F) Zip8 mRNA was quantified by qRT-PCR. **(G)**  
790 Correlation between plasma zinc ( $\mu$ M) and cytoplasmic bioavailable zinc level (AU) in monocytes of

791 healthy donors (n = 15). *p* value was obtained using the Pearson correlation analysis. Bar graphs  
792 show the mean ± SEM. \* = *p* < 0.05, \*\* = *p* < 0.01, and \*\*\*\* = *p* < 0.0001 by two-tailed paired *t*-  
793 test.

794 **Figure 3. Increased extracellular zinc boosts production of IL-1β in human**  
795 **monocytes/macrophages. (A-B)** Freshly purified monocytes from healthy donors (A) and  
796 monocyte-derived macrophages (B) were incubated with the zinc chelator TPEN (150 nM) or the  
797 indicated concentration of ZnCl<sub>2</sub> for 2 hr, followed by stimulation with LPS for 24 hr. Macrophages  
798 were given additional stimulation with ATP for the last 6 h. The amount of IL-1β in the culture  
799 supernatants of monocytes (A; n=7) and macrophages (B; n=4) was quantified by ELISA. **(C-D)** Cell  
800 extracts (Lysate) and supernatants (Sup) of monocytes in (C) and cell extracts (Lysate) of  
801 macrophages in (D) were prepared for immunoblotting for IL-1β and caspase-1 proteins. Band  
802 intensity in immunoblots was quantified by densitometry. β-actin was used as a normalization control  
803 (n=3). Bar graphs show the mean ± SEM. \* = *p* < 0.05, \*\* = *p* < 0.01, and \*\*\* = *p* < 0.005 by two-  
804 tailed paired *t*-test.

805 **Figure 4. Increased intracellular zinc is associated with upregulation of glycolytic metabolism.**  
806 **(A)** Monocytes and macrophages were treated with TPEN 150 nM or ZnCl<sub>2</sub> for 2 hr, followed by  
807 stimulation with LPS for 24 hr. The mRNA expression of Glut1 was quantified by real-time RT-PCR.  
808 Relative expression of Glut1 was normalized to monocytes without LPS treatment. **(B)** The amount  
809 of lactate in the culture supernatant of monocytes was measured using the lactate colorimetric Assay  
810 Kit. **(C-D)** ECAR (extracellular acidification rate) was measured in monocytes (C) and macrophages  
811 (D) pre-incubated with TPEN (1.5 μM) or ZnCl<sub>2</sub> (0 or 45 μM) for 2 hr and stimulated with LPS for  
812 24 hr. ECAR levels were measured following sequential treatment with glucose, oligomycin, and 2-  
813 DG. **(E-F)** Cellular glycolysis capacity in LPS-stimulated monocytes (E) and macrophages (F) under

814 the indicated zinc concentrations. Monocytes and macrophages from four different donors were  
815 independently tested. **(G)** Monocytes were pre-incubated with the indicated concentration of 2-DG  
816 and ZnCl<sub>2</sub>, followed by stimulation with LPS for 4 hr. The amount of IL-1β in culture supernatant  
817 was quantified by ELISA (n=6). Bar graphs show the mean ± SEM. \* =  $p < 0.05$ , \*\* =  $p < 0.01$ , and  
818 \*\*\* =  $p < 0.005$  by two-tailed paired *t*-test.

819 **Figure 5. Intracellular zinc is important for activation of the mTORC1-S6K signaling pathway.**

820 **(A-B)** Immunoblot analysis on Akt-mTOR-S6K pathway in monocytes were treated with TPEN or  
821 ZnCl<sub>2</sub> for 2 hr and stimulated with or without LPS for 15 min (n=3). **(C)** Monocytes were pre-treated  
822 with Akt inhibitor, MK2206, followed by incubation with ZnCl<sub>2</sub> (n=4). **(D)** The phosphorylation of  
823 Akt and S6K in monocytes (C) was plotted with band intensities. The phosphorylation level was  
824 normalized to the expression of total form protein. **(E)** Cells were treated with TPEN or ZnCl<sub>2</sub> for 30  
825 or 15 min, respectively. **(F)** A representative histogram plot of phosphorylated S6 in *ex vivo* CD14<sup>+</sup>  
826 monocytes from healthy donors (left). Correlation of p-p70-S6K with cytoplasmic zinc level (AU) in  
827 monocytes of healthy donors (n = 15) (right). *p* value was obtained using the Pearson correlation  
828 analysis. **(G-H)** Cells were pre-incubated with TPEN or ZnCl<sub>2</sub> for 2 hr, followed by LPS stimulation  
829 for the indicated time. **(I)** Monocytes were pre-incubated with 2-DG and ZnCl<sub>2</sub>, followed by LPS  
830 stimulation. Data is representative of three independent experiments. **(J)** Band intensity of p-p70-  
831 S6K in immunoblots (I) was quantified. Bar graphs show the mean ± SEM. \* =  $p < 0.05$ , \*\* =  $p <$   
832 0.01, and \*\*\* =  $p < 0.005$  by two-tailed paired *t*-test.

833 **Figure 6. The effects of zinc on mTORC1 activity are mediated by PP2A in human**

834 **monocytes/macrophages.** **(A)** Monocyte cell lysates were prepared at 0, 1, 3, 6, 24 hr after  
835 stimulation with LPS (100 ng/ml). **(B)** Monocytes were pretreated with LB-100 or ZnCl<sub>2</sub> for 2 hr,  
836 followed by stimulation with LPS for 30 min. **(C)** The amount of IL-1β was quantified by ELISA

837 in the culture supernatants of LPS-stimulated monocytes in the presence of LB-100 or Okadaic acid.  
838 **(D-E)** 293T cells were transiently transfected with Myc-p70 S6K or control plasmid vector. Cell  
839 lysates of 293T and human macrophages were immunoprecipitated (IP) with antibodies to Myc or  
840 S6K and immunoblotted with the indicated antibodies. **(F)** Immunoblot analysis of phosphorylation  
841 of p70-S6K and PP2A-C was performed with monocytes, which were treated with TPEN (150 nM)  
842 and ZnCl<sub>2</sub> (3 or 30 μM) for 15 min. **(G)** Lysates from freshly purified monocytes were incubated  
843 with various concentration of ZnCl<sub>2</sub> (0, 30, 100, 500 or 1,000 μM), LB-100 (5 μM), or Okadaic acid  
844 (50 nM). PP2A activity was measured using a protein phosphatase activity assay kit as described in  
845 Material and Methods. Bar graphs show the mean ± SEM. \* =  $p < 0.05$ , \*\* =  $p < 0.01$ , and \*\*\* =  $p <$   
846 0.005 by two-tailed paired *t*-test.

847 **Figure 7. Zinc-mediated metabolic reprogramming in monocytes is associated with clinical**  
848 **parameters of RA patients. (A)** Correlation of Zip8 gene expression in peripheral monocytes with  
849 RA clinical parameters ( $n = 17$ ). **(B)** mRNA level of MT2A was quantified by real-time RT-PCR in  
850 peripheral monocytes of HCs ( $n=13$ ) and RA patients ( $n=32$ ). **(C)** Correlation of MT2A gene  
851 expression in peripheral monocytes with Zip8 or IL-1β gene expression in RA patients ( $n = 17$ ). **(D-**  
852 **E)** Immunoblot analysis of phosphorylation of p70-S6K and pro-IL-1β was performed with  
853 monocytes of HCs ( $n = 6$ ) and RA patients ( $n = 11$ ). **(F)** PP2A activity was measured in lysates from  
854 freshly purified monocytes of HCs and RA patients as described in Figure 6G. **(G-H)** ΔCt of Zip8  
855 mRNA in the two groups (Mean ± SEM; -9.58±0.15 of low and -8.31±0.67 of high group). Scatter  
856 plots show RA clinical parameters and MT2A mRNA level in monocytes of RA patients having  
857 higher and lower zip8 mRNA expression. **(I-J)** Immunoblot analysis of phosphorylation of p70-S6K  
858 and pro-IL1β were performed with monocytes of RA patients having higher and lower Zip8 mRNA  
859 expression. *p* values were obtained using the Pearson correlation analysis (A and C). Bar graphs and  
860 scatter plots show the mean ± SD. \* =  $p < 0.05$  and \*\* =  $p < 0.01$  by two-tailed unpaired *t*-test.

# Figure 1

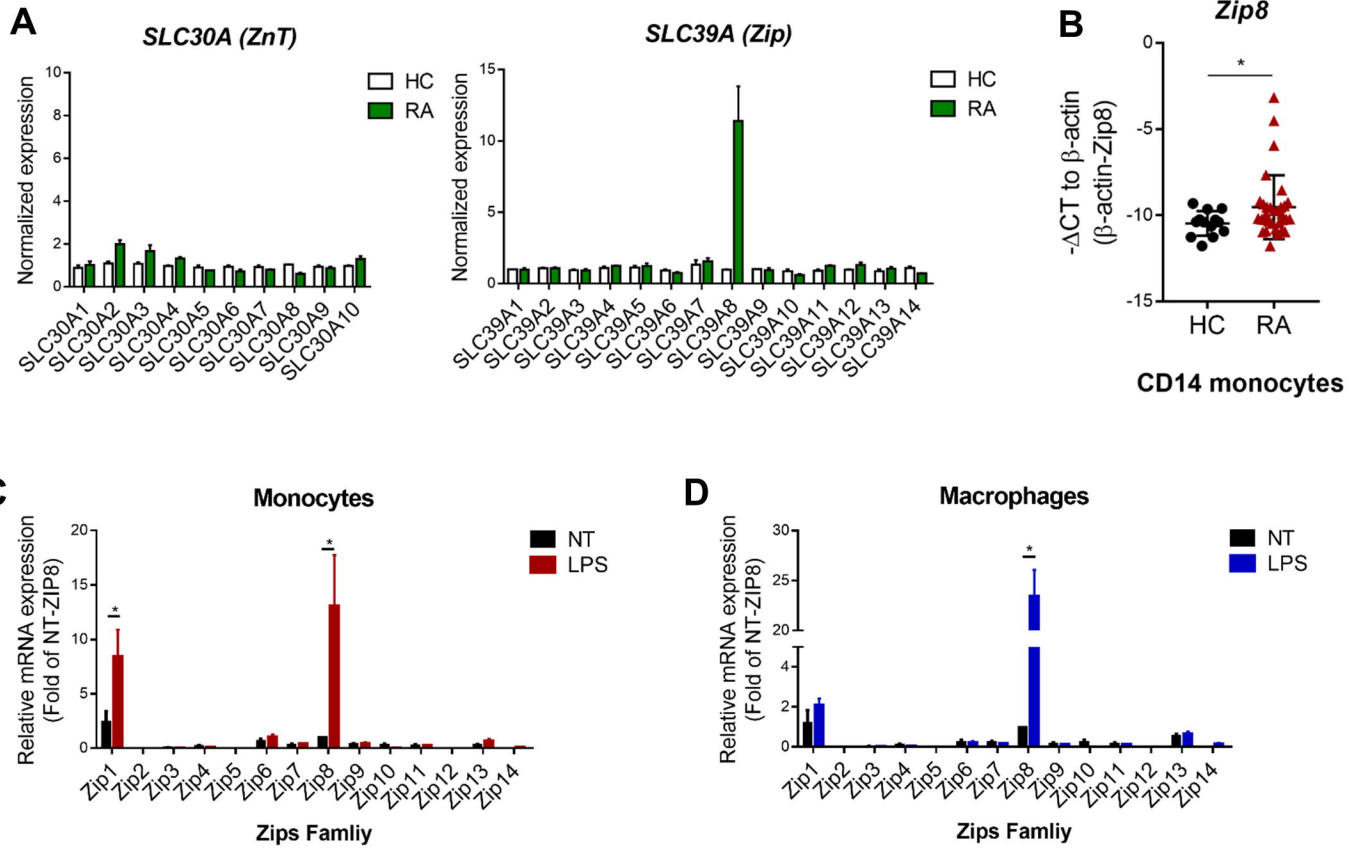

# Figure 2

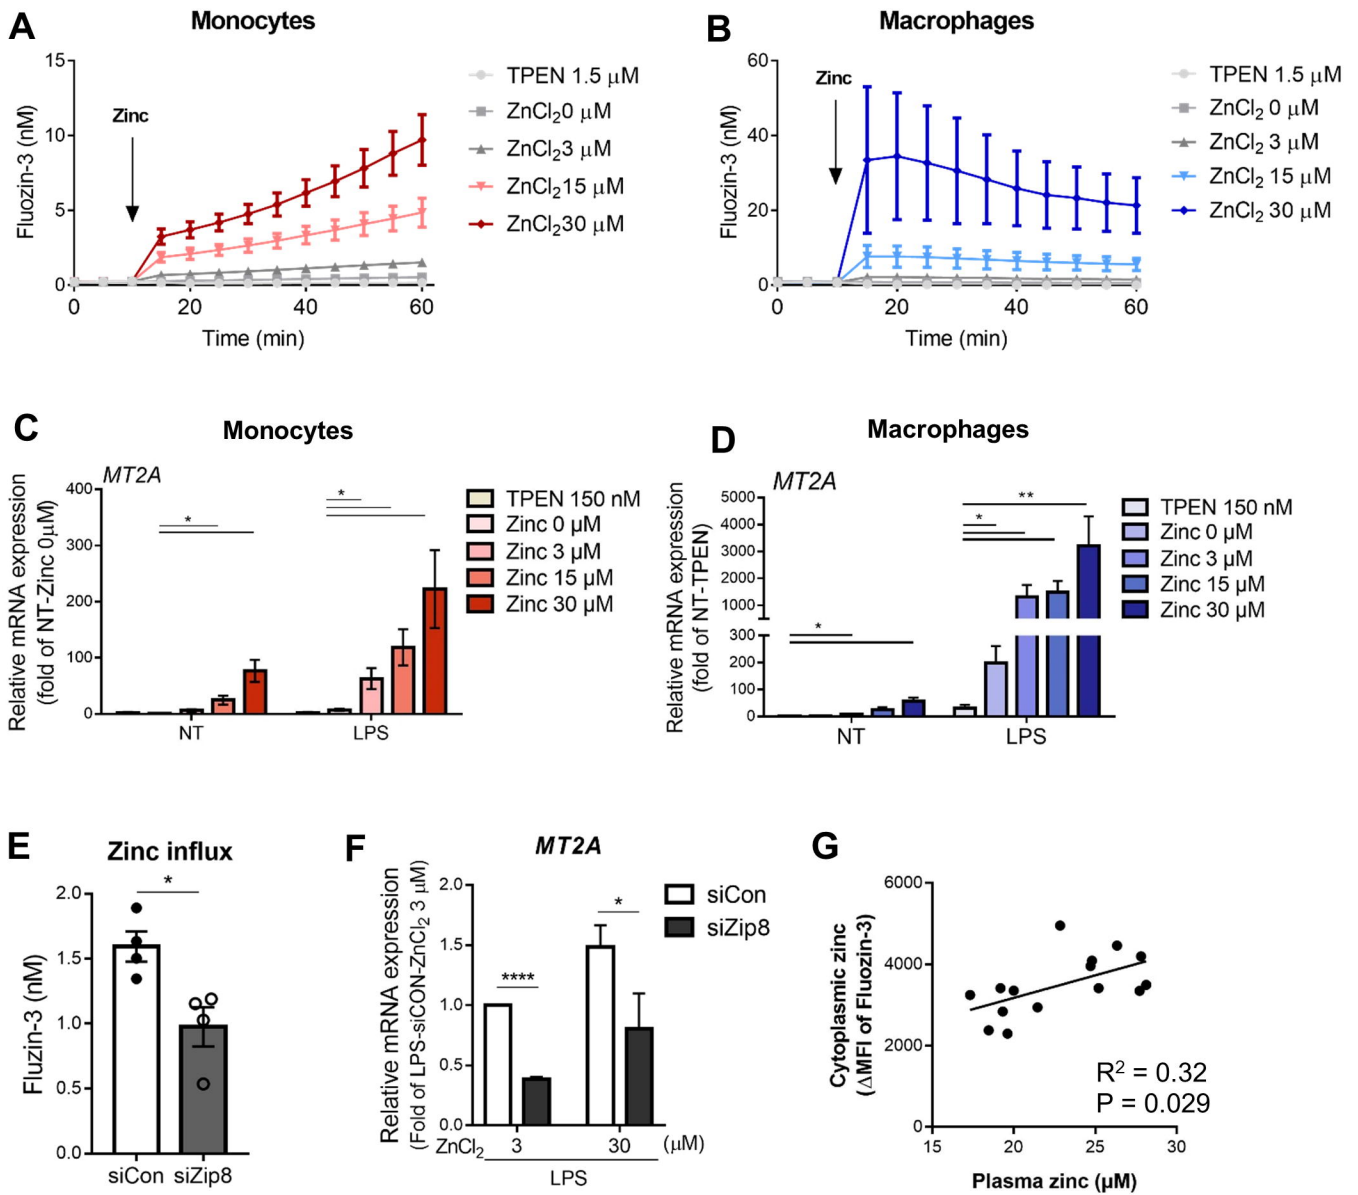



# Figure 3

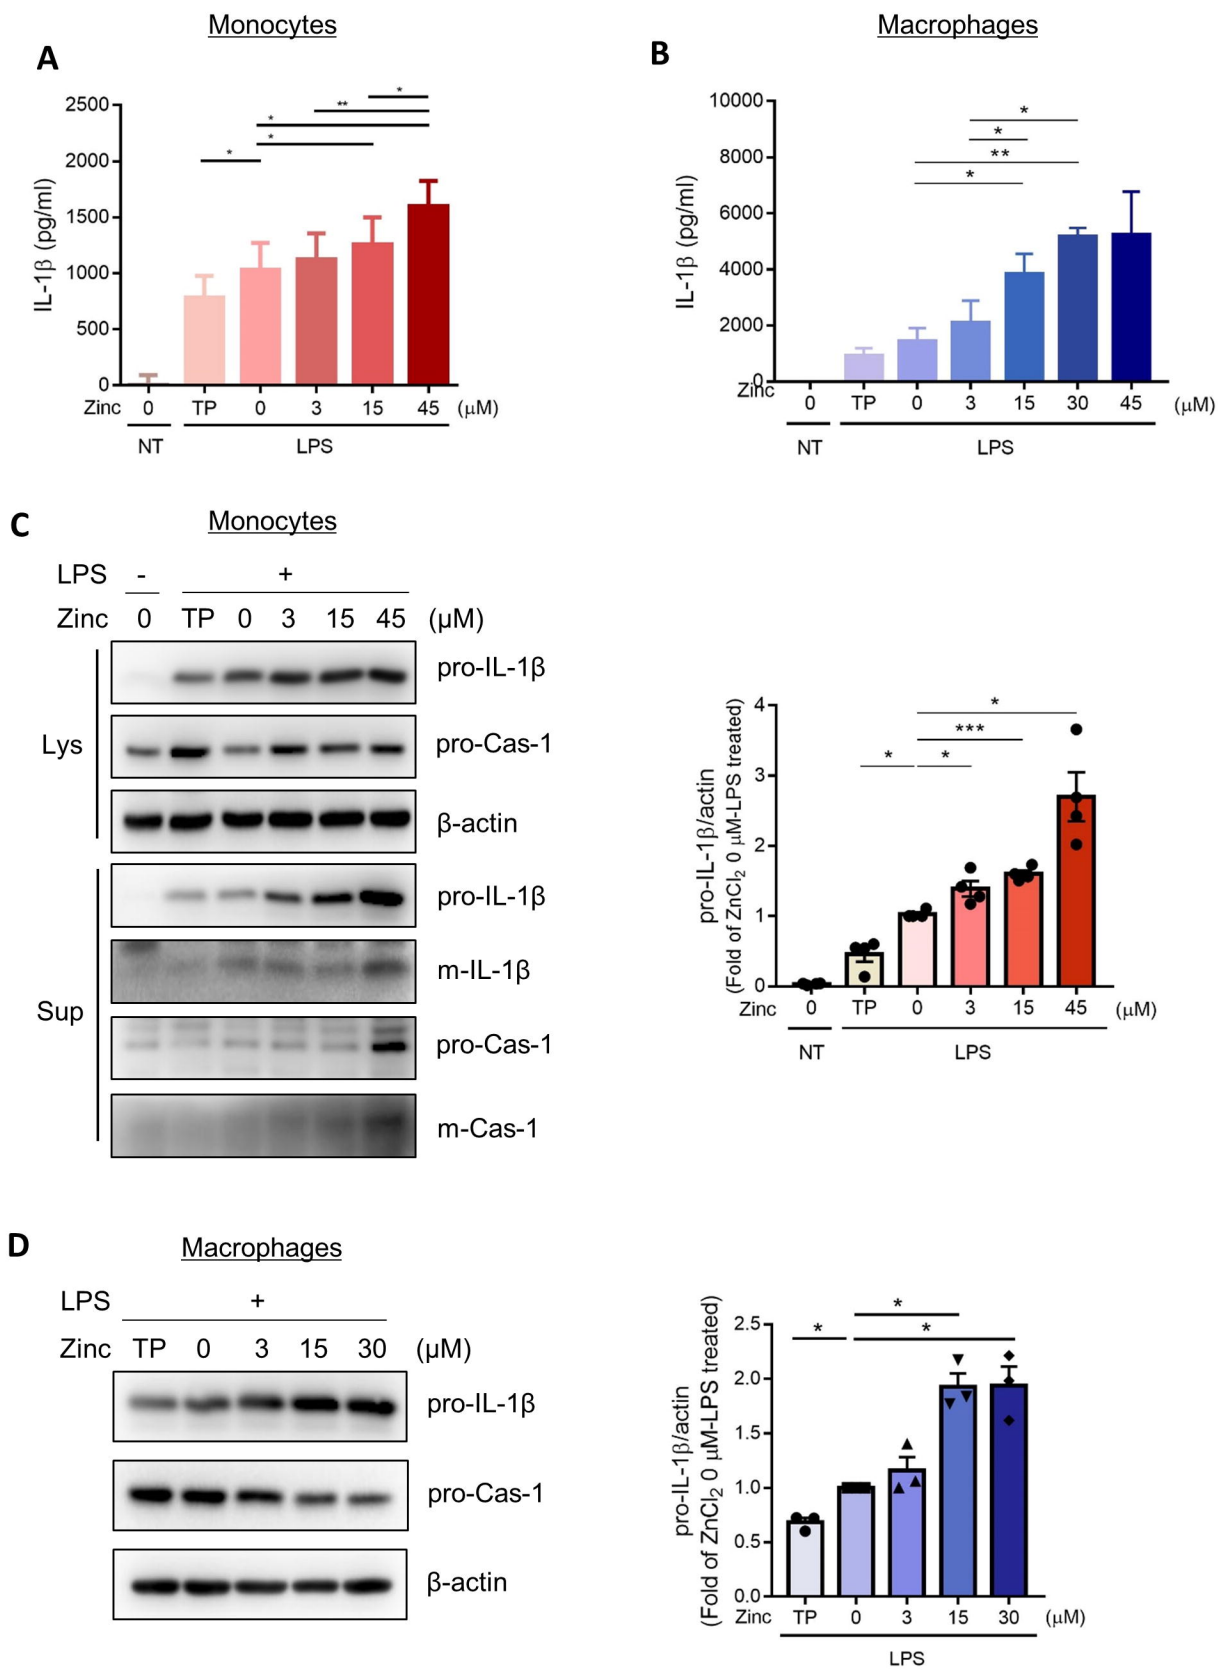

# Figure 4

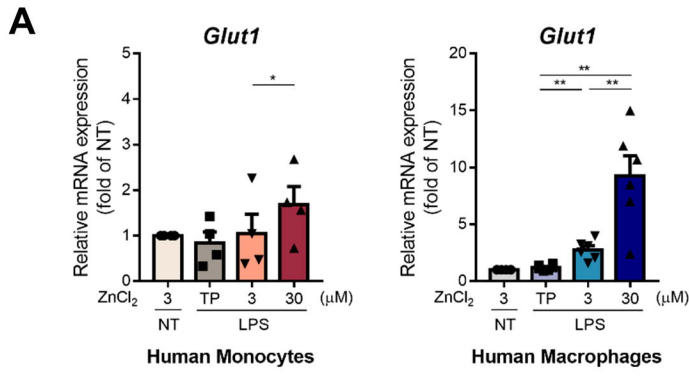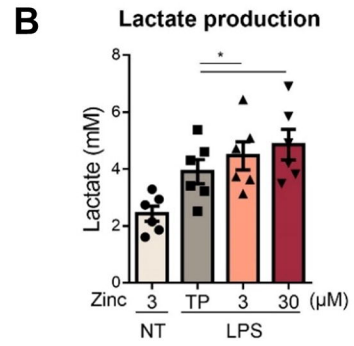

## C Monocytes

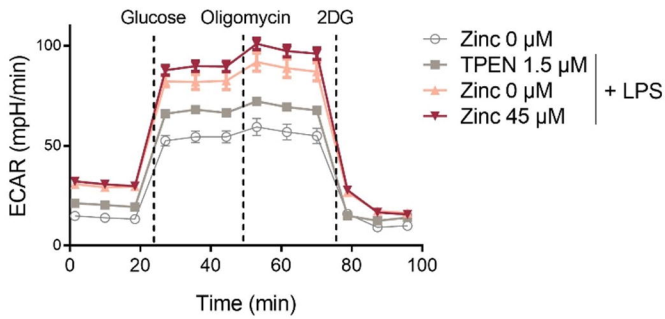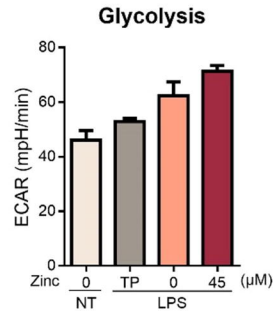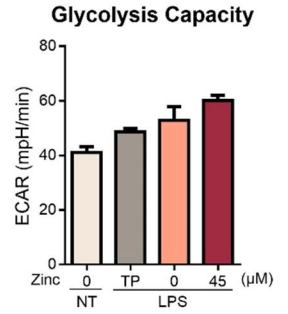

## D Macrophages

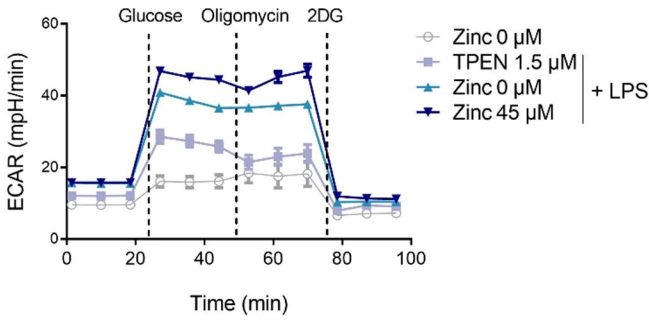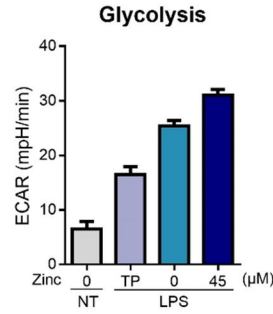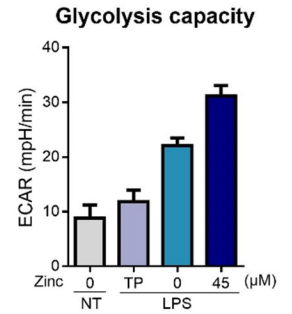

## E Glycolysis capacity

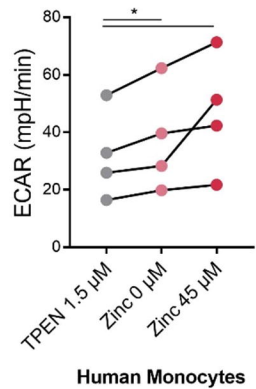

## F Glycolysis Capacity

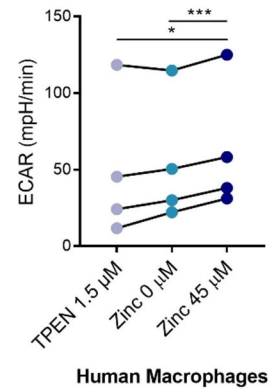

## G

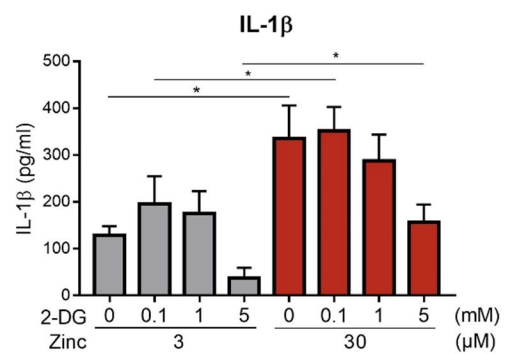

# Figure 5

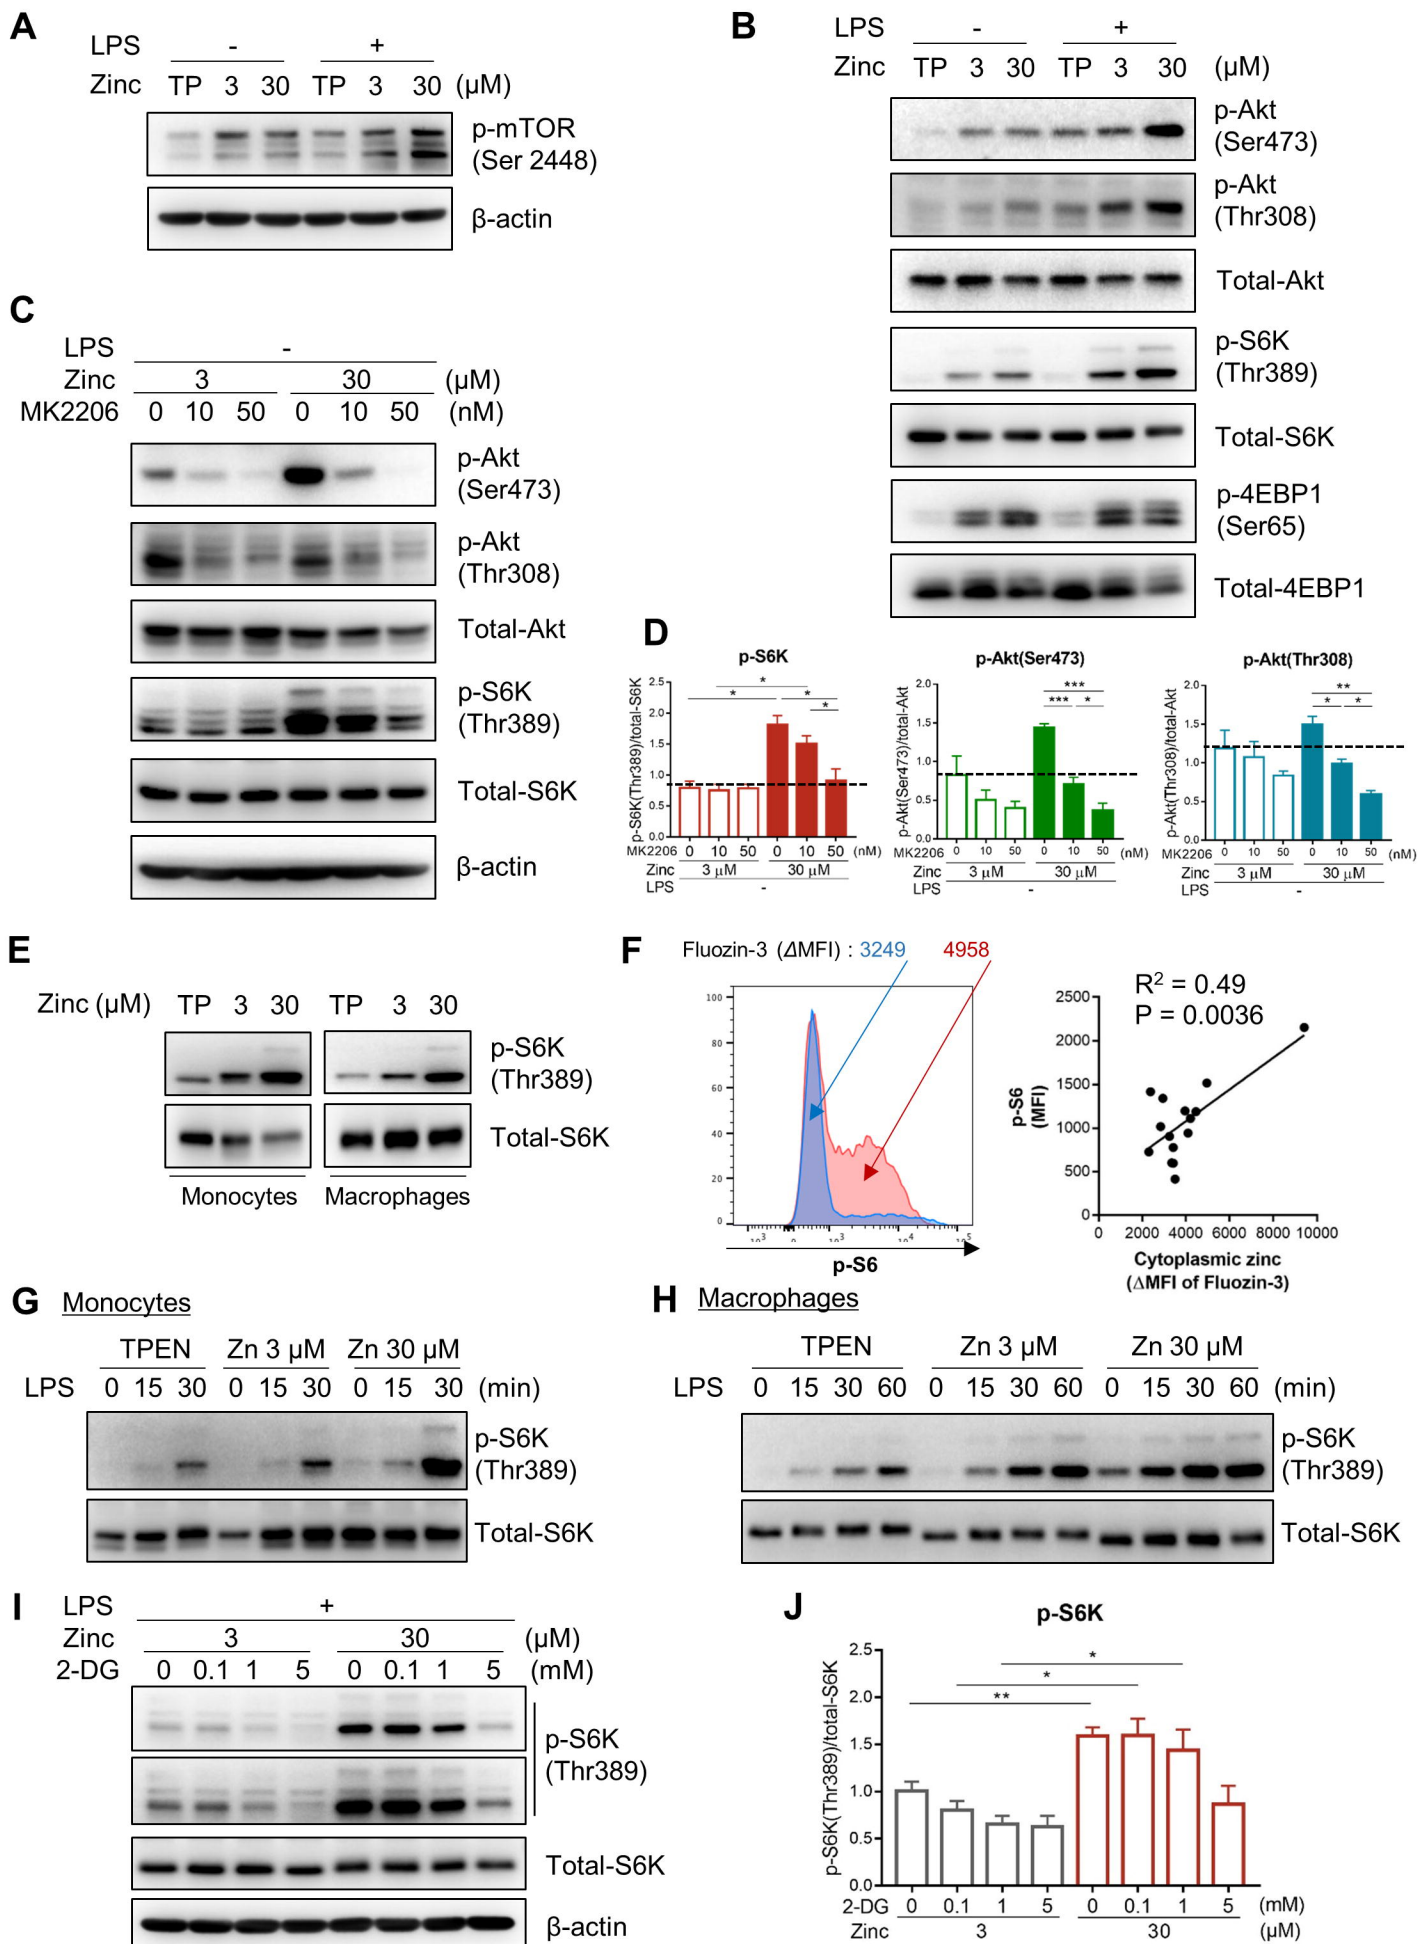

# Figure 6

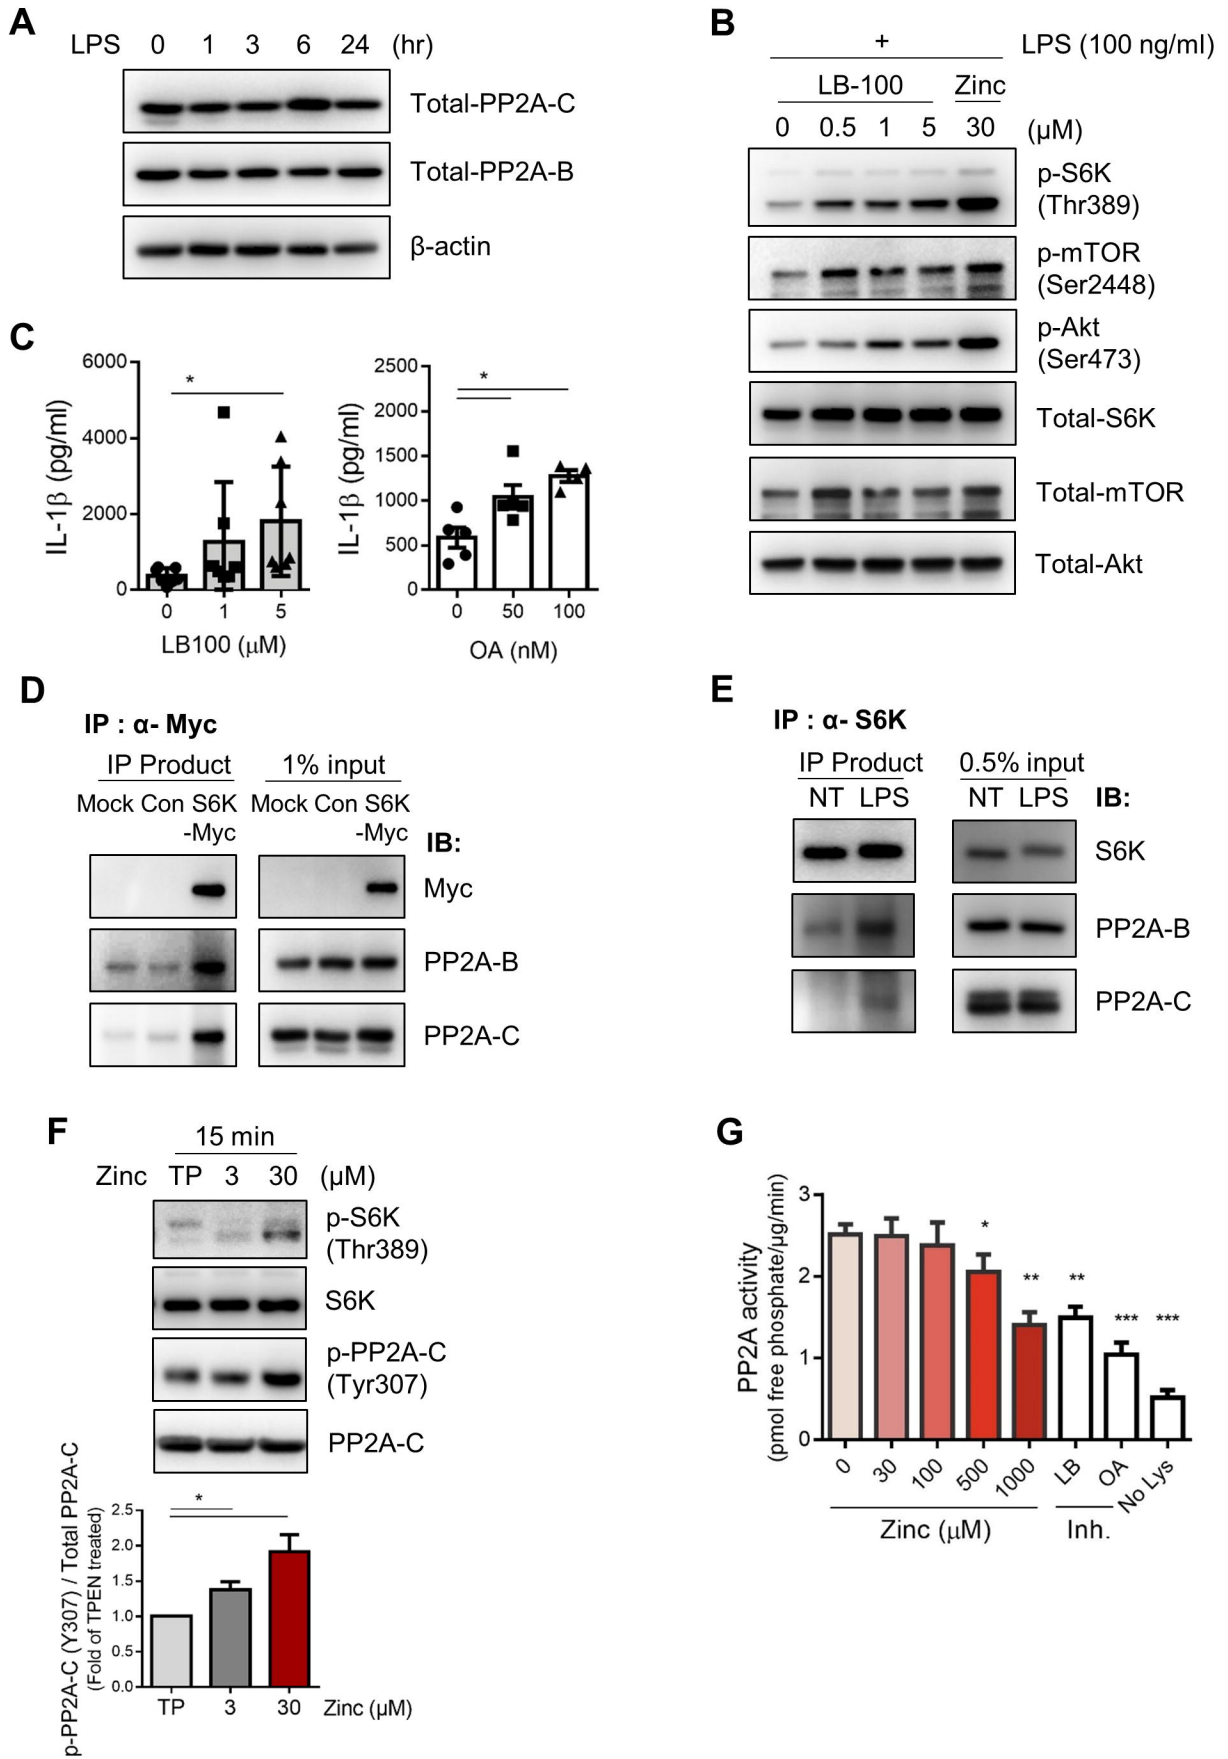

# Figure 7

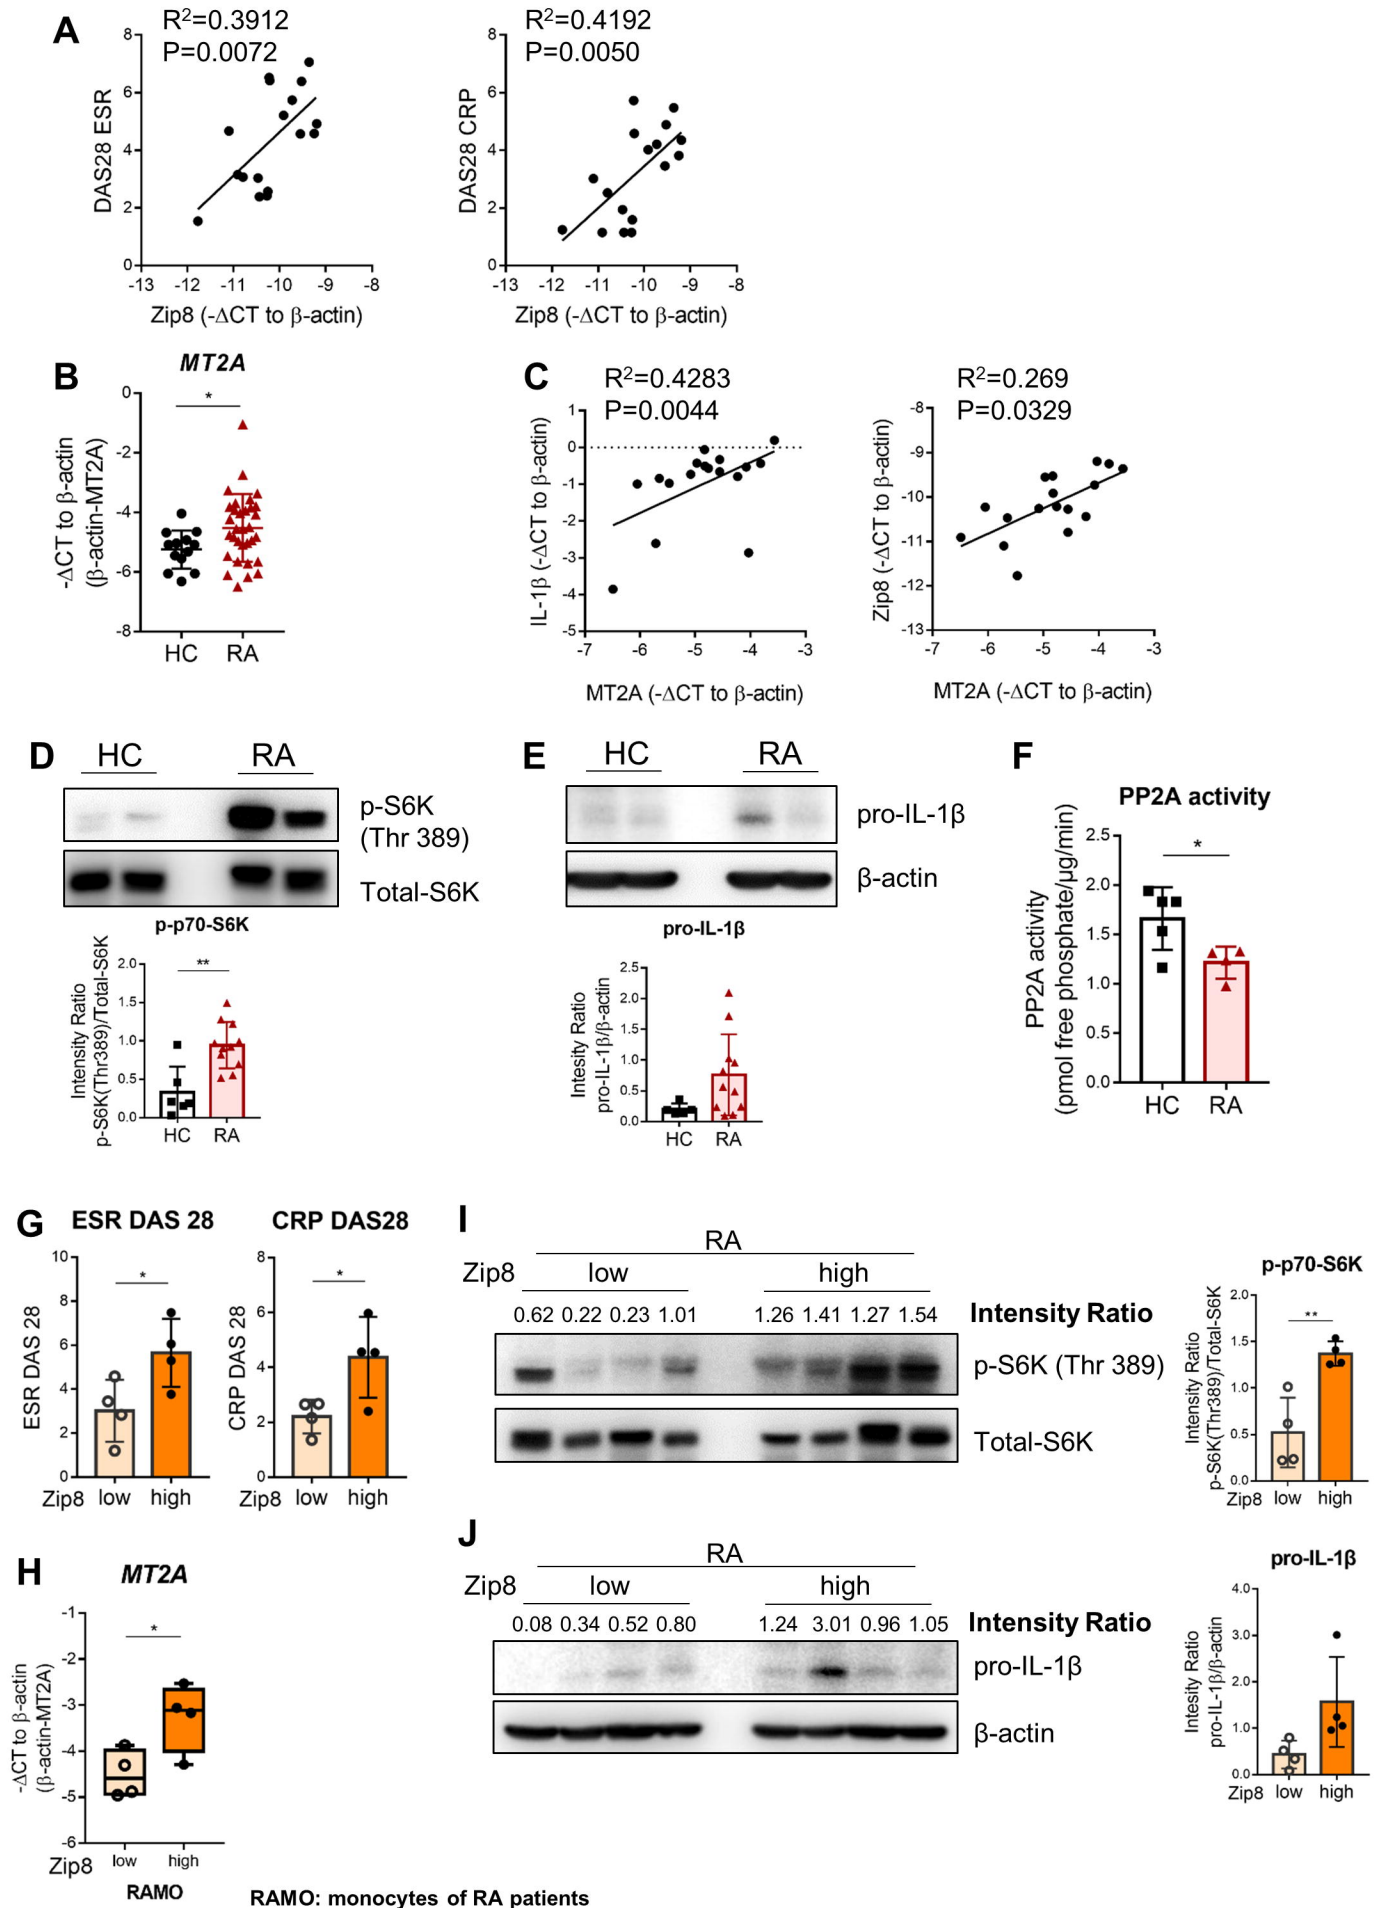

Source: https://www.biorxiv.org/content/10.1101/2021.04.16.437150v1.full.pdf
